# Supplementary material
Source: PubMed Central journal article supplement (PMC3967587)
Supplement: NIHMS559715-supplement-01.pdf [file NIHMS559715-supplement-01.pdf]

## Supplementary Materials

### 3-Ketone-4,6-diene ceramide analogs exclusively induce apoptosis in chemo-resistant cancer cells

*Adharsh P. Ponnapakam*<sup>†</sup>, *Jiawang Liu*<sup>‡</sup>, *Kaustubh N. Bhinge*<sup>§</sup>, *Barbara A. Drew*<sup>†</sup>, *Tony L. Wang*<sup>†</sup>, *James W. Antoon*<sup>†</sup>, *Tom T. Nguyen*<sup>‡</sup>, *Patrick S. Dupart*<sup>‡</sup>, *Yuji Wang*<sup>#</sup>, *Ming Zhao*<sup>#</sup>, *Yong-Yu Liu*<sup>§</sup>, *Maryam Foroozesh*<sup>‡\*</sup>, *Barbara S. Beckman*<sup>†</sup>

<sup>†</sup> Department of Pharmacology and Department of Medicine, Tulane University School of Medicine, 1430 Tulane Avenue, New Orleans, Louisiana 70112

<sup>‡</sup> Department of Chemistry, Xavier University of Louisiana, 1 Drexel Drive, New Orleans, Louisiana 70125

<sup>§</sup> College of Pharmacy Basic Pharmaceutical Sciences, University of Louisiana at Monroe, 1800 Bienville, Monroe, Louisiana 71209

<sup>#</sup> College of Pharmaceutical Sciences, Capital Medical University, Beijing 100069, PR China

#### Contents

|                                                                                   |            |
|-----------------------------------------------------------------------------------|------------|
| <b><sup>1</sup>H and <sup>13</sup>C NMR spectra</b>                               | <b>S2</b>  |
| <b>Compound 3-up</b>                                                              | <b>S2</b>  |
| <b>Compound 3-down</b>                                                            | <b>S4</b>  |
| <b>Analog 401</b>                                                                 | <b>S6</b>  |
| <b>Analog 402</b>                                                                 | <b>S8</b>  |
| <b>Analog 403</b>                                                                 | <b>S10</b> |
| <b>Analog 404</b>                                                                 | <b>S12</b> |
| <b>Analog 406</b>                                                                 | <b>S14</b> |
| <b>2D NMR spectra</b>                                                             | <b>S16</b> |
| <b>Analog 403 (COSY and NOE)</b>                                                  | <b>S16</b> |
| <b>Analog 406 (COSY and NOE)</b>                                                  | <b>S18</b> |
| <b>Compound 3-up (COSY)</b>                                                       | <b>S20</b> |
| <b>Analog 401 (COSY)</b>                                                          | <b>S22</b> |
| <b>Analog 402 (COSY)</b>                                                          | <b>S23</b> |
| <b>Analog 404 (COSY)</b>                                                          | <b>S24</b> |
| <b>Inhibition curves of ceramide analogs towards breast cancer cells</b>          | <b>S25</b> |
| <b>Figure S1. Effect of ceramide analogs on cell viability of breast cancers</b>  | <b>S25</b> |
| <b>Figure S2. Effect of ceramide analogs on breast cancer clonogenic survival</b> | <b>S25</b> |

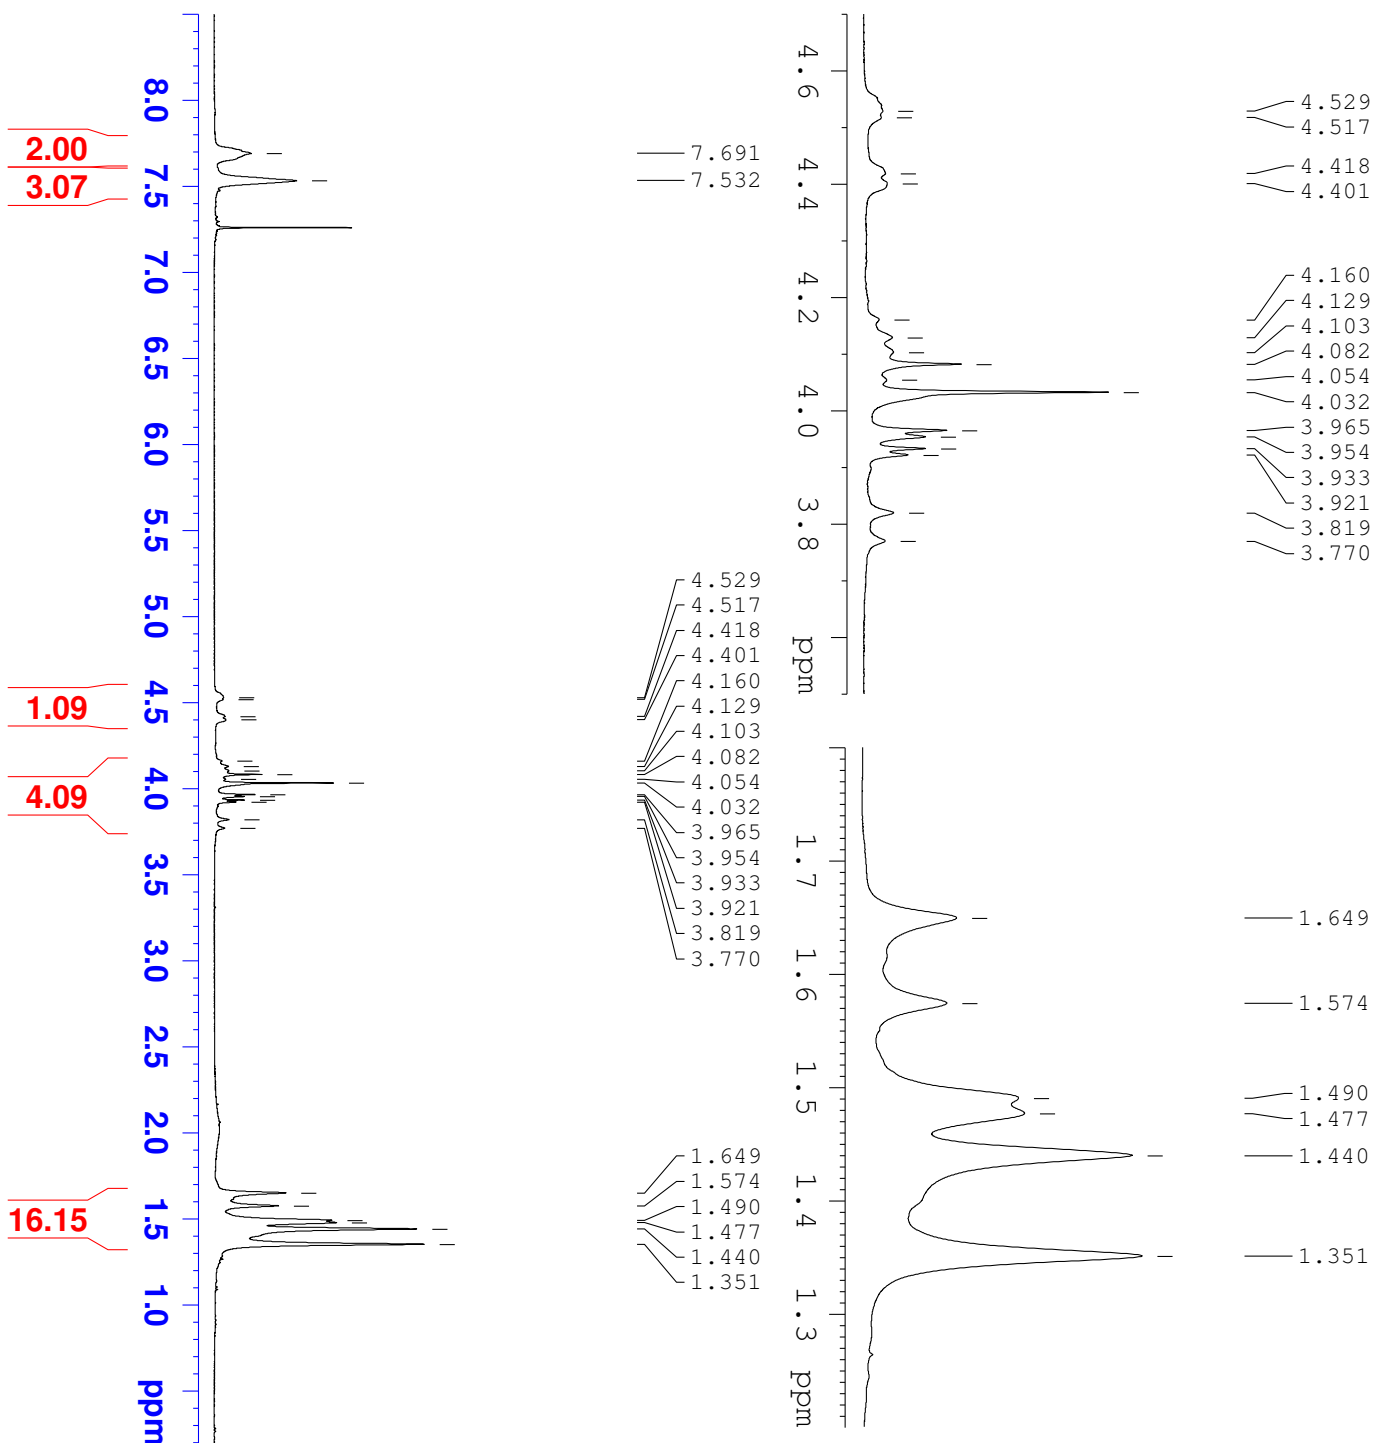

Current Data Parameters  
 NAME 3\_up  
 EXPNO 1  
 PROCNO 1

F2 - Acquisition Parameters

Date\_ 20120411  
 Time 17.54  
 INSTRUM FOURIER300  
 PROBD 5 mm DUL 13C-1  
 PULPROG zg30  
 TD 65536  
 SOLVENT CDC13  
 NS 16  
 DS 2  
 SWH 6103.516 Hz  
 FIDRES 0.093132 Hz  
 AQ 5.3687091 sec  
 RG 33.7582  
 DW 81.920 usec  
 DE 6.50 usec  
 TE 296.4 K  
 D1 1.00000000 sec  
 TD0 1

==== CHANNEL f1 =====  
 SFO1 300.1818537 MHz  
 NUC1 1H  
 P1 8.75 usec  
 P1M1 25.00000000 W  
 F2 - Processing parameters  
 SI 65536  
 SF 300.1800050 MHz  
 WDW EM  
 SSB 0  
 GB 0  
 PC 1.00

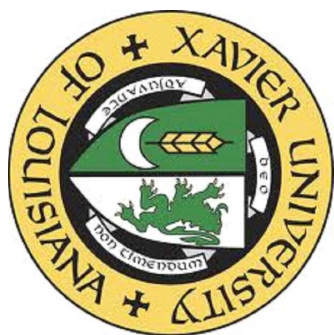

3\_up

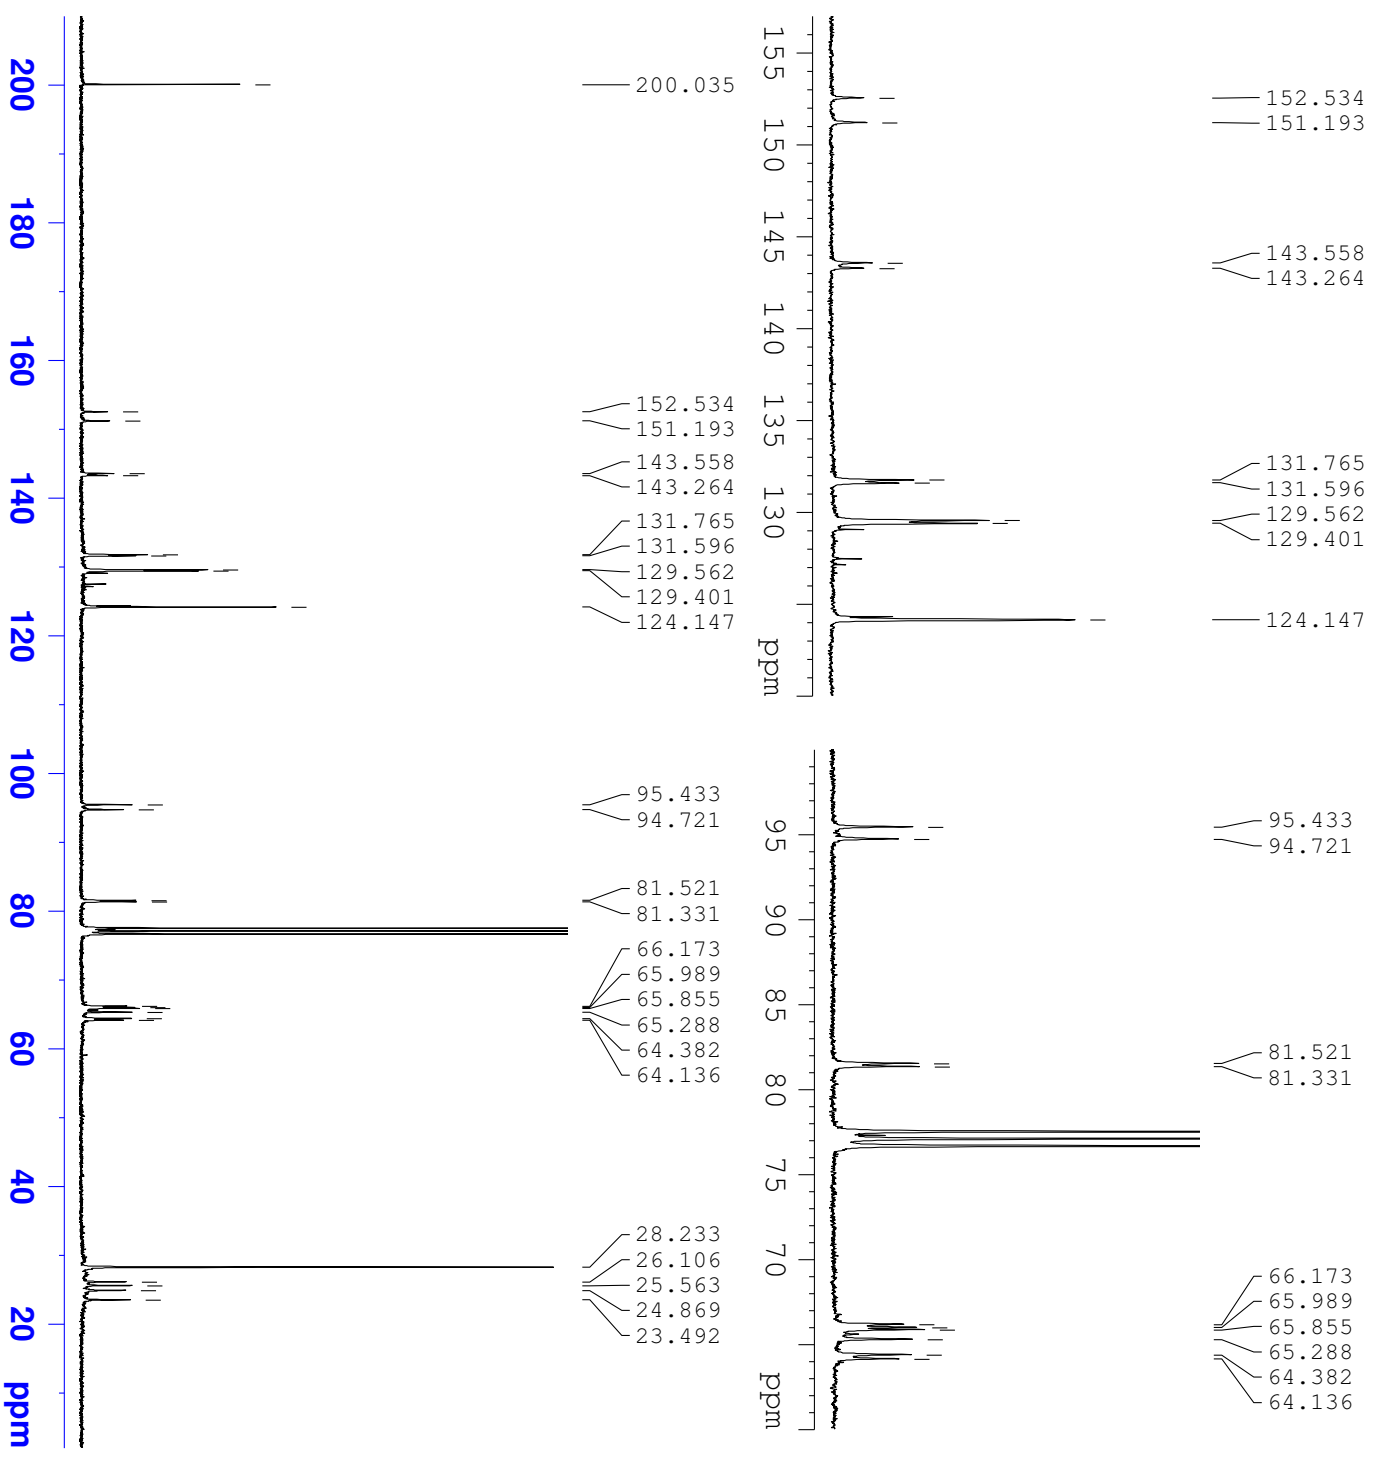

Current Data Parameters  
 NAME 3\_up  
 EXPNO 2  
 PROCNO 1

F2 - Acquisition Parameters  
 Date\_ 20120415  
 Time 16.00  
 INSTRUM FOURIER300  
 PROBD 5 mm DUL 13C-1  
 PULPROG zgpg30  
 TD 65536  
 SOLVENT CDCl3  
 NS 20000  
 DS 4  
 SWH 24414.063 Hz  
 FIDRES 0.372529 Hz  
 AQ 1.3421773 sec  
 RG 501.187  
 DW 20.480 usec  
 DE 6.50 usec  
 TE 296.7 K  
 D1 2.0000000 sec  
 D11 0.0300000 sec  
 D31 0.00001600 sec  
 D40 0.02432300 sec  
 L4 34  
 L5 49  
 F32 105.00 usec  
 TD0 1

===== CHANNEL f1 =====  
 SFO1 75.4878687 MHz  
 NUC1 13C  
 P1 16.00 usec  
 PLW1 60.00000000 W

===== CHANNEL f2 =====  
 SFO2 300.1812007 MHz  
 NUC2 1H  
 CPDPRG12 waltz16  
 PCPD2 105.00 usec  
 PLW2 10.00000000 W  
 PLWI2 0.36280999 W  
 PLWI3 0.40000001 W

F2 - Processing parameters  
 SI 32768  
 SF 75.4803210 MHz  
 WDW EM  
 SSB 0  
 LB 1.00 Hz  
 GB 0  
 PC 1.40

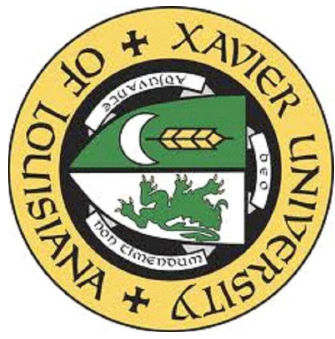

3\_down

- 4.412
- 4.400
- 4.305
- 4.285
- 4.191
- 4.142
- 4.119
- 4.068
- 4.040
- 4.026
- 4.013
- 3.986
- 3.940
- 3.893
- 3.843
- 3.779
- 3.758
- 3.747
- 3.728
- 3.696

- 1.639
- 1.616
- 1.471
- 1.402

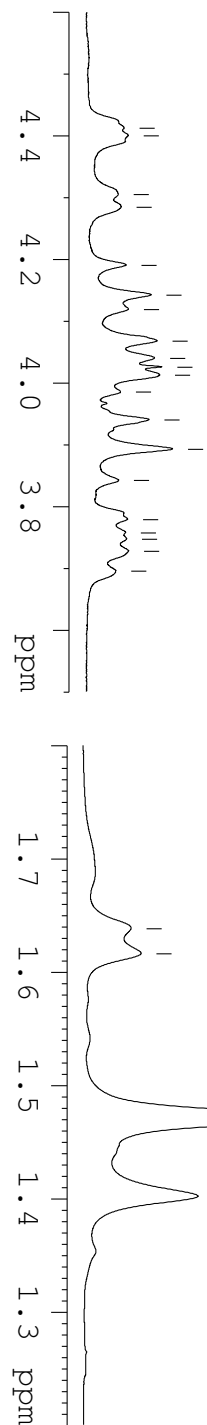

- 7.723
- 7.710
- 7.706
- 7.698
- 7.691
- 7.533

- 4.412
- 4.400
- 4.305
- 4.285
- 4.191
- 4.142
- 4.119
- 4.068
- 4.040
- 4.026
- 4.013
- 3.986
- 3.940
- 3.893
- 3.843
- 3.779
- 3.758
- 3.747
- 3.728
- 3.696

- 1.639
- 1.616
- 1.471
- 1.402

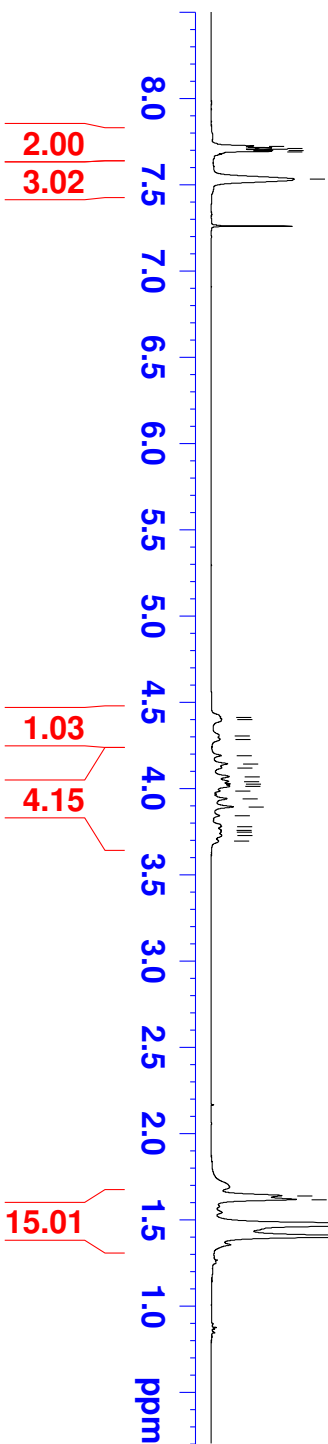

Current Data Parameters  
 NAME 3\_down  
 EXPNO 1  
 PROCNO 1

F2 - Acquisition Parameters  
 Date\_ 20120411  
 Time 15.28

INSTRUM FOURIER300  
 PROBHD 5 mm DUL 13C-1  
 PULPROG zg30  
 TD 65536  
 SOLVENT CDC13  
 NS 32  
 DS 2

SWH 6103.516 Hz  
 FIDRES 0.093132 Hz  
 AO 5.3687091 sec  
 RG 32  
 DW 81.920 usec  
 DE 6.50 usec  
 TE 297.1 K  
 D1 1.00000000 sec  
 TD0 1

==== CHANNEL f1 =====  
 SFO1 300.1818537 MHz  
 NUC1 1H  
 P1 8.75 usec  
 P1M1 25.00000000 W

F2 - Processing parameters  
 SI 65536  
 SF 300.1800049 MHz  
 WDW EM  
 SSB 0  
 GB 0  
 PC 1.00

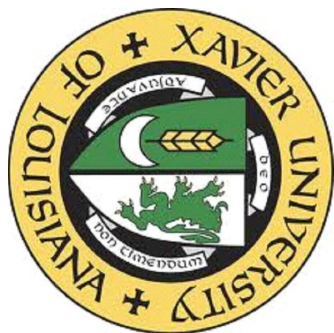

3\_down

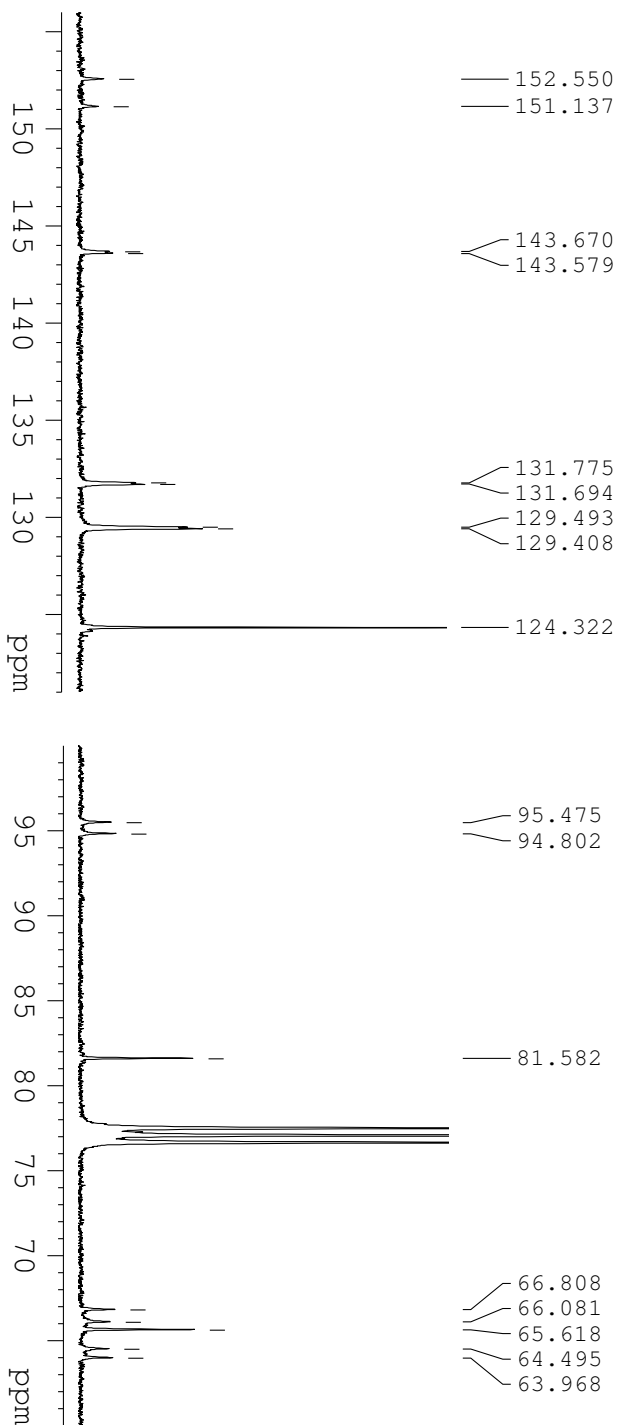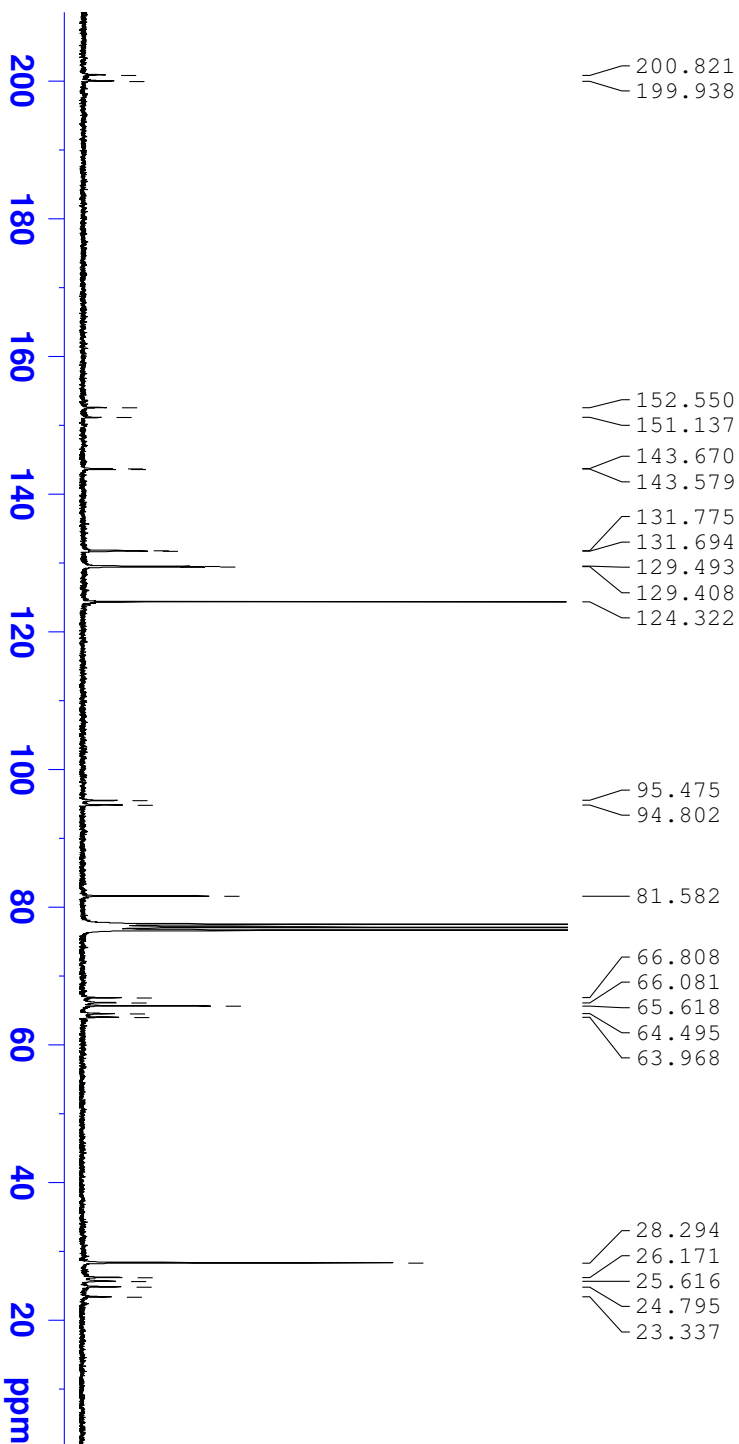

Current Data Parameters  
 NAME 3\_down  
 EXPNO 2  
 PROCNO 1

F2 - Acquisition Parameters  
 Date\_ 20120413  
 Time 15.44  
 INSTRUM FOURIER300  
 PROBD 5 mm DUL 13C-1  
 PULPROG zgpg30  
 TD 65536  
 SOLVENT CDCl3  
 NS 4375  
 DS 4  
 SWH 24414.063 Hz  
 FIDRES 0.372529 Hz  
 AQ 1.3421773 sec  
 RG 501.187  
 DW 20.480 usec  
 DE 6.50 usec  
 TE 297.3 K  
 D1 2.0000000 sec  
 D11 0.0300000 sec  
 D31 0.00001600 sec  
 D40 0.02432300 sec  
 I4 34  
 I5 49  
 E32 105.00 usec  
 TD0 1

==== CHANNEL f1 =====

SFO1 75.4878687 MHz  
 NUC1 13C  
 P1 16.00 usec  
 PLW1 60.00000000 W

==== CHANNEL f2 =====

SFO2 300.1812007 MHz  
 NUC2 1H  
 CPDPRG12 waltz16  
 PCPD2 105.00 usec  
 PLW2 10.00000000 W  
 PLW12 0.36280999 W  
 PLW13 0.40000001 W

F2 - Processing parameters

SI 32768  
 SF 75.4803210 MHz  
 WDW EM  
 SSB 0  
 LB 1.00 Hz  
 GB 0  
 PC 1.40

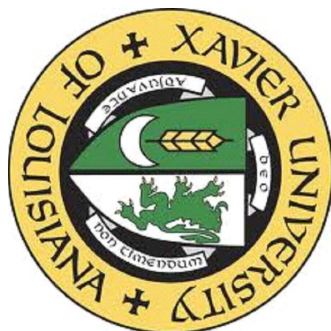

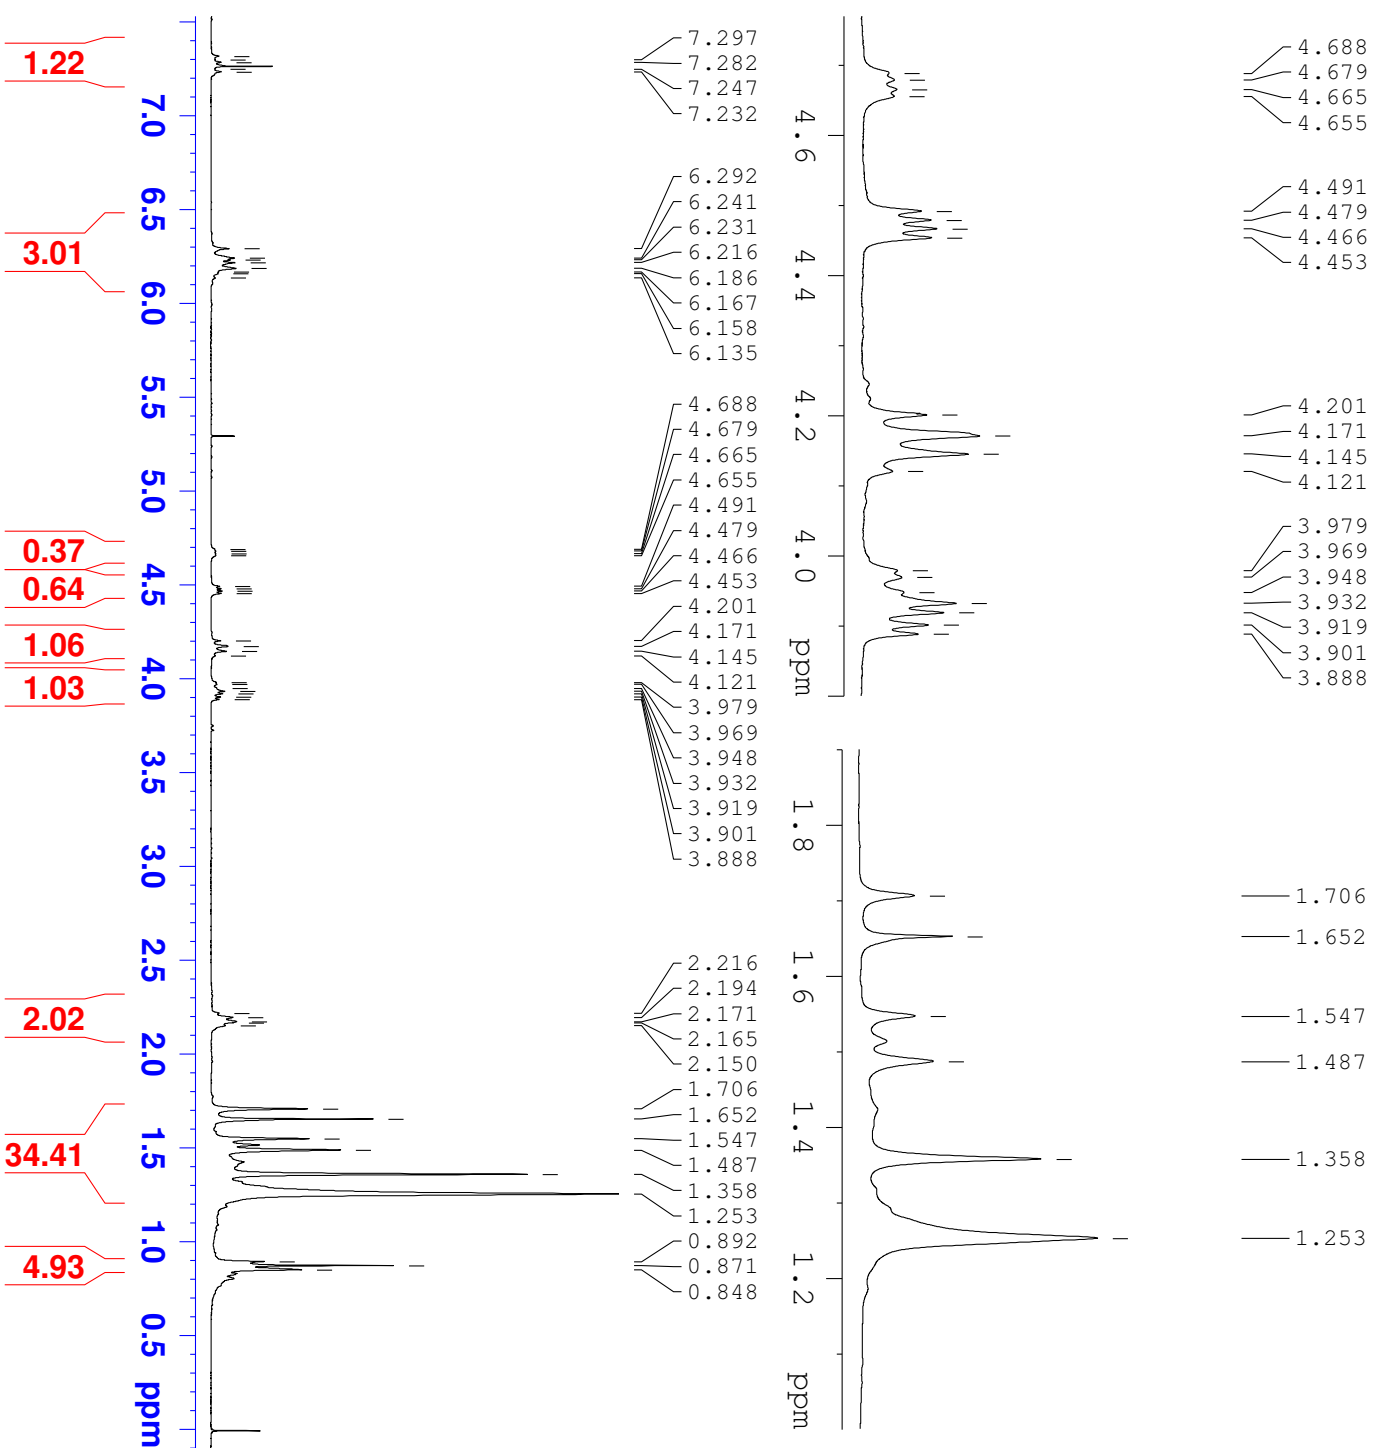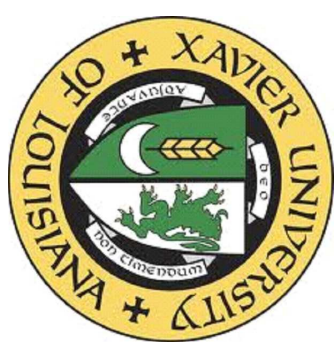

Current Data Parameters  
 NAME 401  
 EXPNO 1  
 PROCNO 1

F2 - Acquisition Parameters  
 Date\_ 20120423  
 Time 17.57  
 INSTRUM FOURIER300  
 PROBDH 5 mm DUL 13C-1  
 PULPROG zg30  
 TD 65536  
 SOLVENT CDCl3  
 NS 32  
 DS 2  
 SWH 6103.516 Hz  
 FIDRES 0.093132 Hz  
 AQ 5.3687091 sec  
 RG 17.8865  
 DW 81.920 usec  
 DE 6.50 usec  
 TE 296.3 K  
 D1 1.00000000 sec  
 TD0 1

==== CHANNEL F1 =====  
 SFO1 300.1818537 MHz  
 NUC1 1H  
 P1 8.75 usec  
 P1M1 25.00000000 W  
 F2 - Processing parameters  
 SI 65536  
 SF 300.1800050 MHz  
 WDM EM  
 SSB 0  
 LB 0.30 Hz  
 GB 0  
 PC 1.00

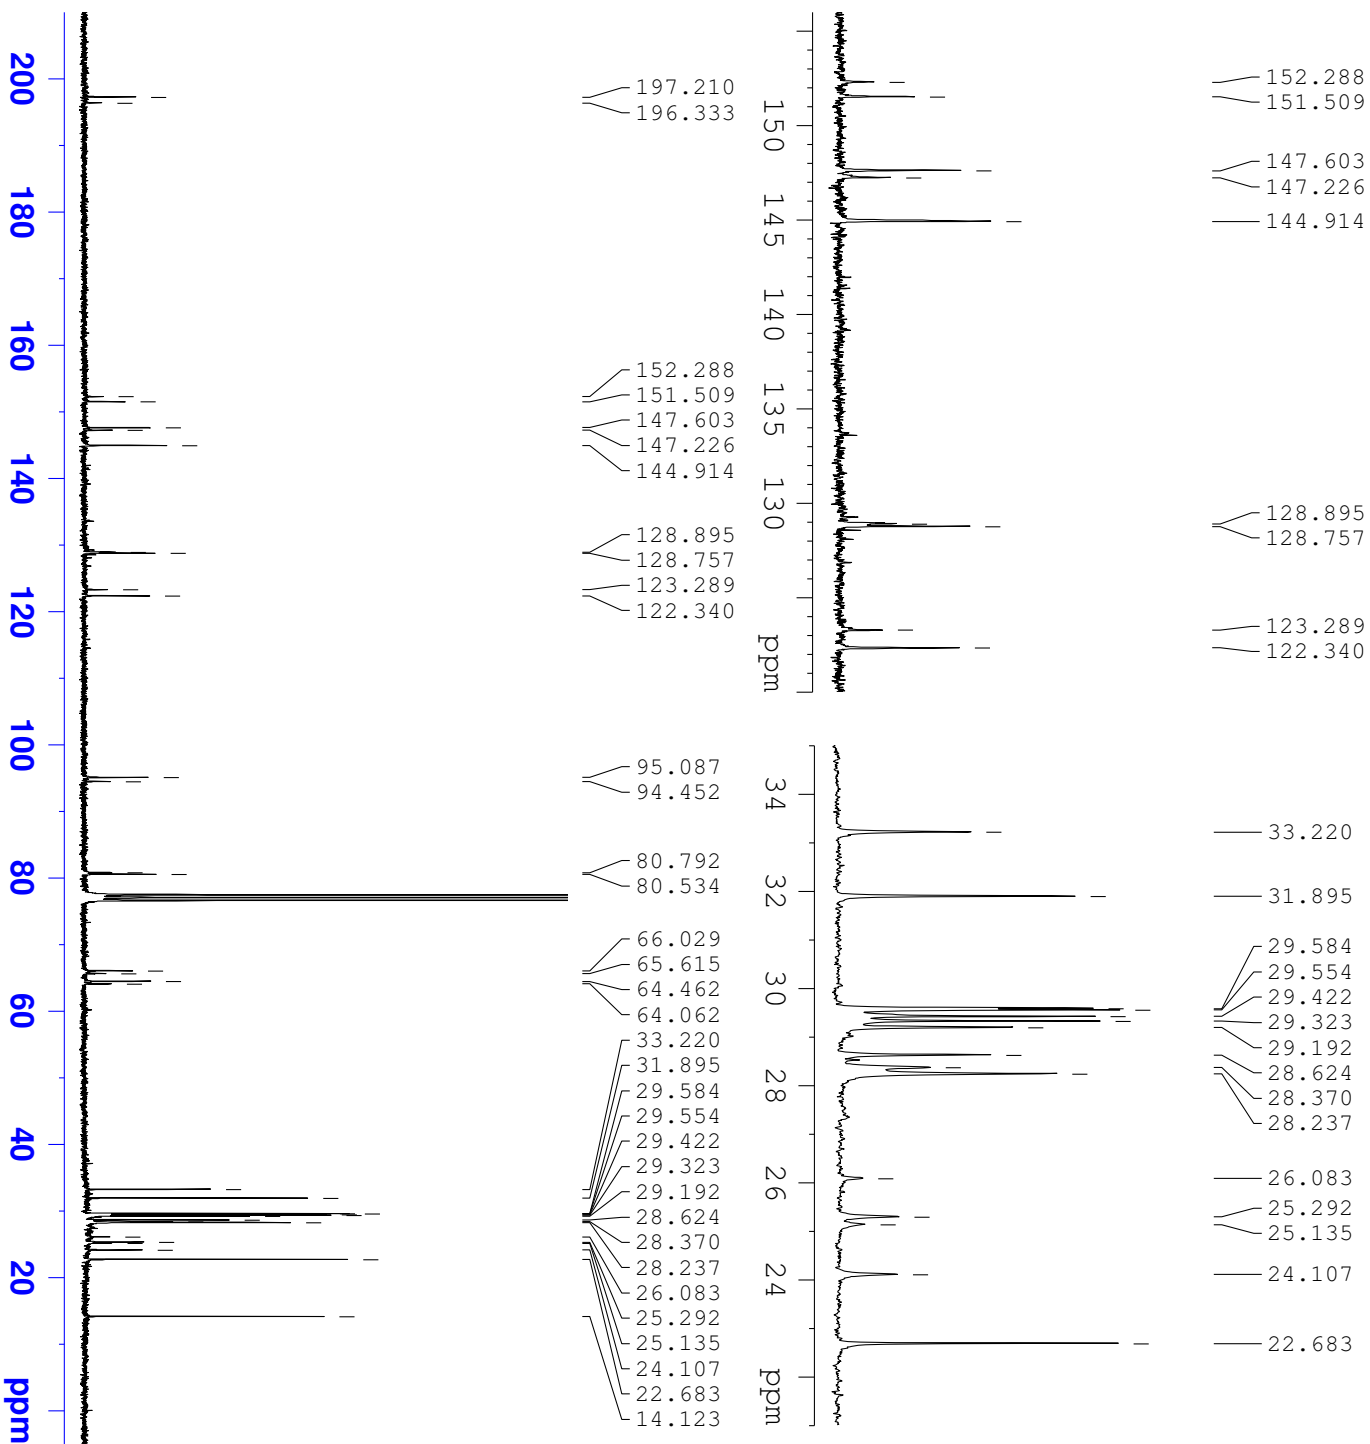

Current Data Parameters  
 NAME 401  
 EXPNO 2  
 PROCNO 1

F2 - Acquisition Parameters  
 Date\_ 20120423  
 Time 18.08  
 INSTRUM FOURIER300  
 PROBD 5 mm DUL 13C-1  
 PULPROG zgpg30  
 TD 65536  
 SOLVENT CDCl3  
 NS 16000  
 DS 4  
 SWH 24414.063 Hz  
 FIDRES 0.372529 Hz  
 AQ 1.3421773 sec  
 RG 501.187  
 DW 20.480 usec  
 DE 6.50 usec  
 TE 296.5 K  
 D1 2.0000000 sec  
 D11 0.0300000 sec  
 D31 0.00001600 sec  
 D40 0.02432300 sec  
 I4 34  
 I5 49  
 F32 105.00 usec  
 TD0 1

==== CHANNEL f1 =====  
 SFO1 75.4878687 MHz  
 NUC1 13C  
 P1 16.00 usec  
 PL1 60.00000000 W  
 ===== CHANNEL f2 =====  
 SFO2 300.1812007 MHz  
 NUC2 1H  
 CPDPRG12 waltz16  
 PCPD2 105.00 usec  
 PLM2 10.00000000 W  
 PLM12 0.36280999 W  
 PLM13 0.40000001 W

F2 - Processing parameters  
 SI 32768  
 SF 75.4803210 MHz  
 WMW EM  
 SSB 0  
 LB 1.00 Hz  
 GB 0  
 PC 1.40

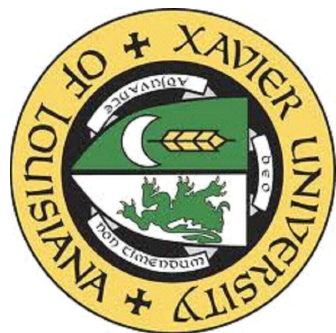

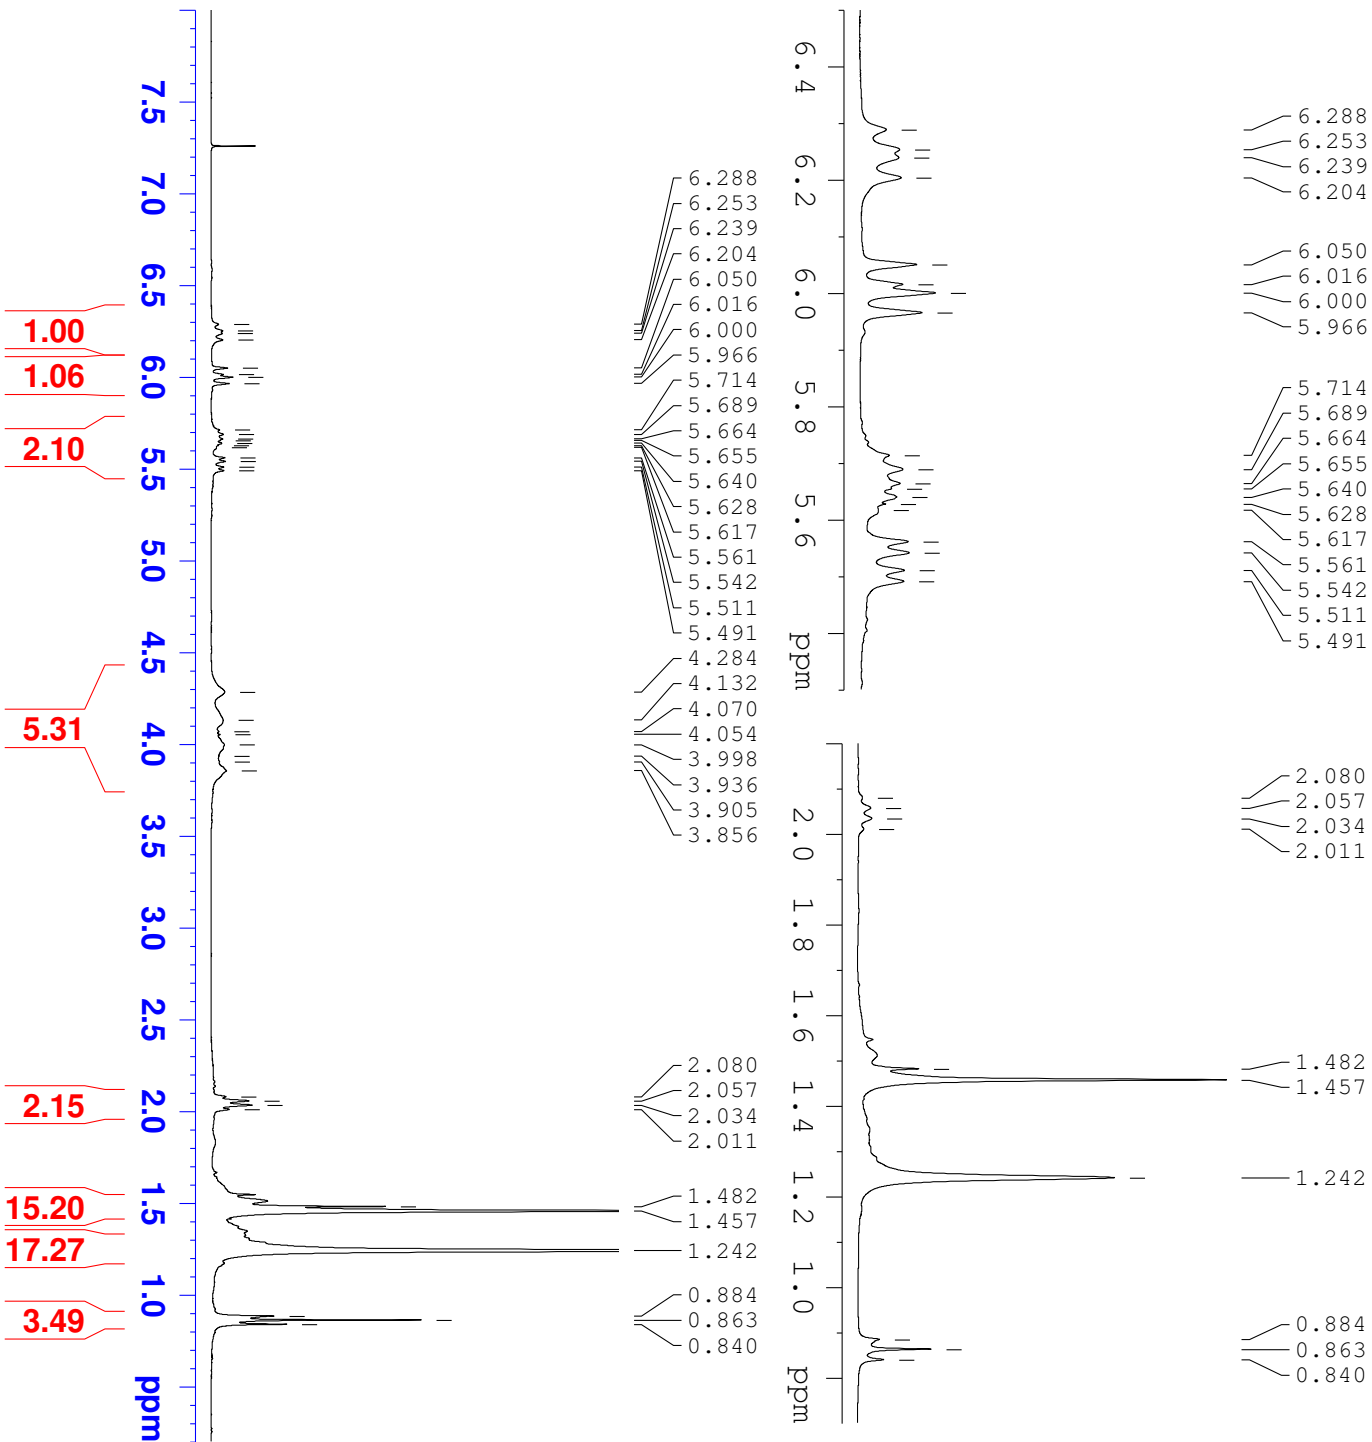

Current Data Parameters  
 NAME 402  
 EXPNO 1  
 PROCNO 1

F2 - Acquisition Parameters

Date\_ 20120512  
 Time 19.15  
 INSTRUM FOURIER300  
 PROBD 5 mm DUL 13C-1  
 PULPROG zg30  
 TD 65536  
 SOLVENT CDC13  
 NS 32  
 DS 2  
 SWH 6103.516 Hz  
 FIDRES 0.093132 Hz  
 AQ 5.3687091 sec  
 RG 7.24528  
 DW 81.920 usec  
 DE 6.50 usec  
 TE 297.8 K  
 D1 1.00000000 sec  
 TD0 1

==== CHANNEL f1 =====  
 SFO1 300.1818537 MHz  
 NUC1 1H  
 P1 8.75 usec  
 PLW1 25.00000000 W

F2 - Processing parameters  
 SI 65536  
 SF 300.1800049 MHz  
 WDM EM  
 SSB 0  
 LB 0.30 Hz  
 GB 0  
 PC 1.00





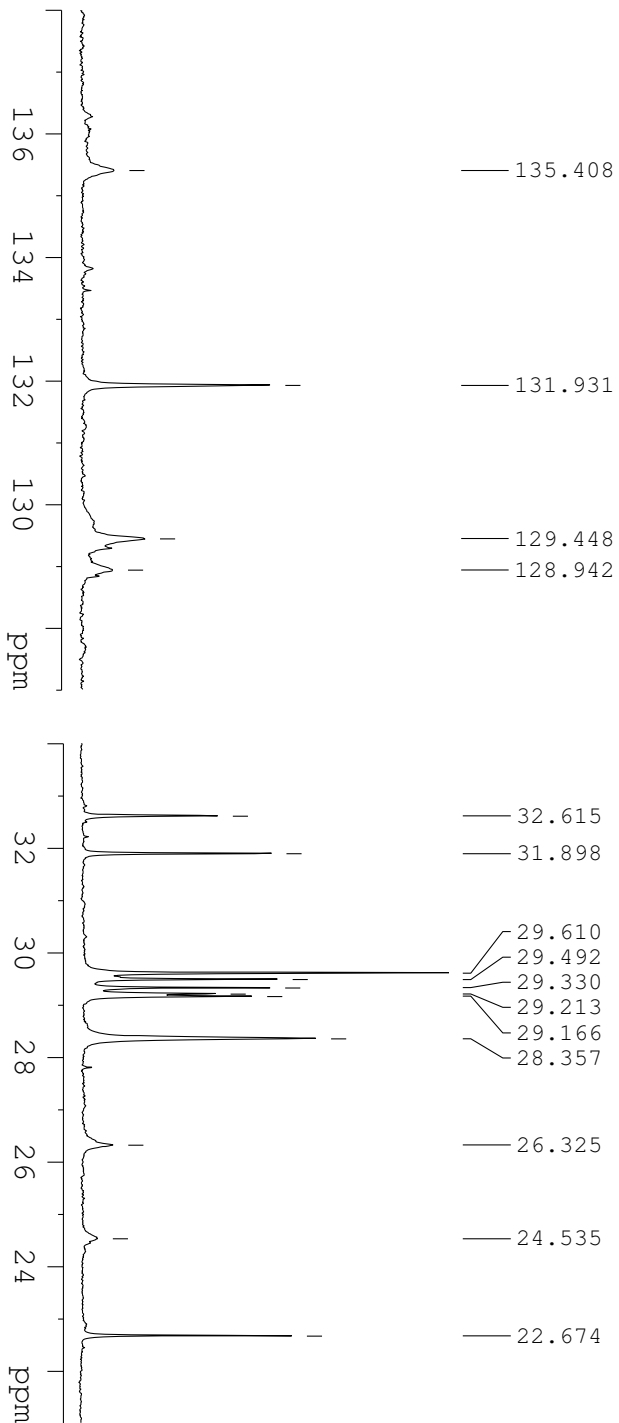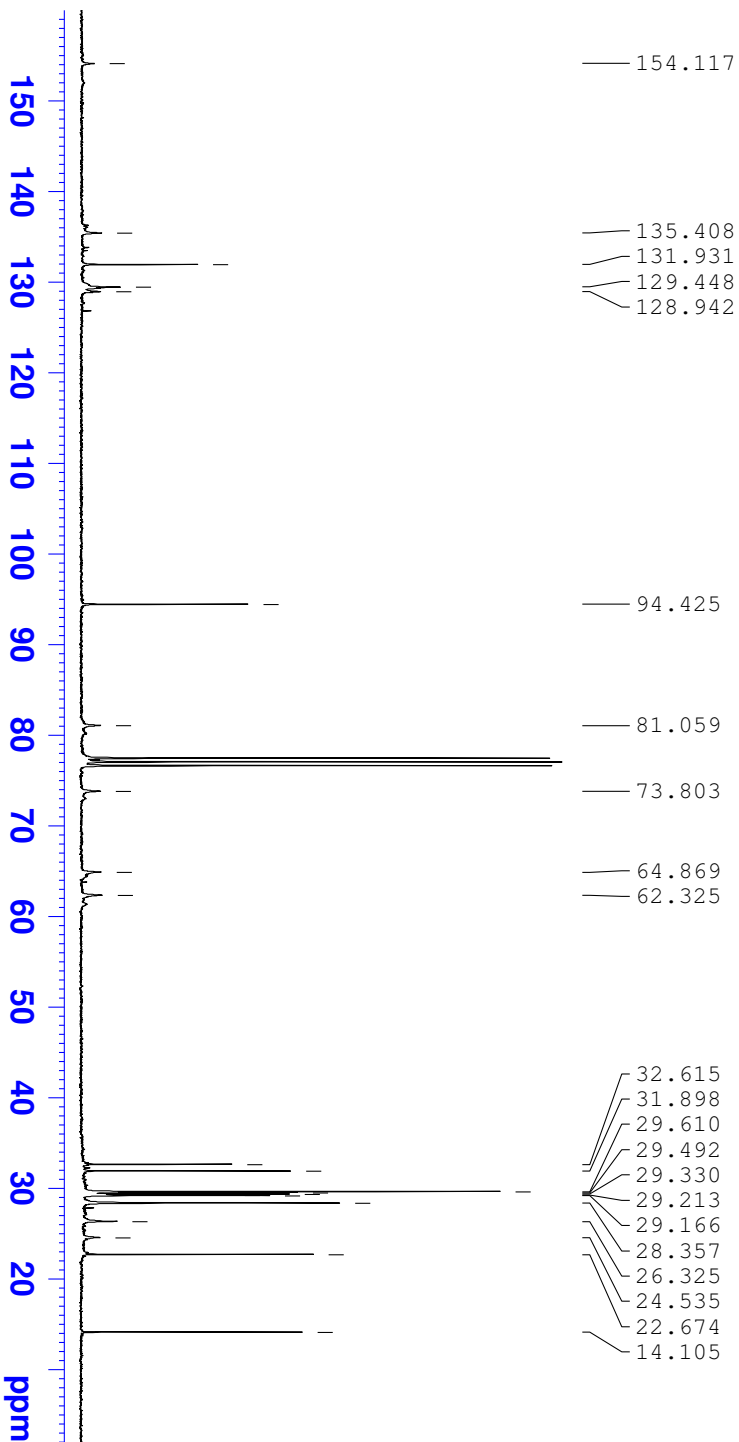

Current Data Parameters  
NAME 402  
EXPNO 2  
PROCNO 1

F2 - Acquisition Parameters  
Date\_ 20120515  
Time 19.21  
INSTRUM FORTIER300  
PROBHD 5 mm DUL 13C-1  
PULPROG zgpg30  
TD 65536  
SOLVENT CDCl3  
NS 15000  
DS 4  
SWH 24414.063 Hz  
FIDRES 0.372529 Hz  
AQ 1.3421773 sec  
RG 501.187  
DW 20.480 usec  
DE 6.50 usec  
TE 298.0 K  
D1 2.00000000 sec  
D11 0.03000000 sec  
D31 0.00001600 sec  
D40 0.02432300 sec  
I4 34  
I5 49  
F32 105.00 usec  
TD0 1

==== CHANNEL F1 =====

SFO1 75.4878687 MHz  
NUC1 13C  
P1 16.00 usec  
PLM1 60.00000000 W

==== CHANNEL F2 =====

SFO2 300.1812007 MHz  
NUC2 1H  
CPDPRG12 waltz16  
PCPD2 105.00 usec  
PLM2 10.00000000 W  
PLM12 0.36280999 W  
PLM13 0.40000001 W

F2 - Processing parameters

SI 32768  
SF 75.4803210 MHz  
WDW EM  
SSB 0  
LB 1.00 Hz  
GB 0  
PC 1.40



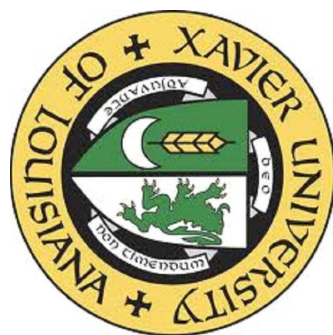

Current Data Parameters  
 NAME 403  
 EXPNO 1  
 PROCNO 1

F2 - Acquisition Parameters  
 Date\_ 20120605  
 Time 14.05  
 INSTRUM FOURIER300  
 PROBD 5 mm DUL 13C-1  
 PULPROG zg30  
 TD 65536  
 SOLVENT CDC13  
 NS 16  
 DS 2  
 SWH 6103.516 Hz  
 FIDRES 0.093132 Hz  
 AQ 5.3687091 sec  
 RG 22.5468  
 DW 81.920 usec  
 DE 6.50 usec  
 TE 296.4 K  
 D1 1.00000000 sec  
 TD0 1

==== CHANNEL f1 =====  
 SFO1 300.1818537 MHz  
 NUC1 1H  
 P1 8.75 usec  
 PLW1 25.00000000 W

F2 - Processing parameters  
 SI 65536  
 SF 300.1800000 MHz  
 WDM EM  
 SSB 0  
 LB 0.30 Hz  
 GB 0  
 PC 1.00

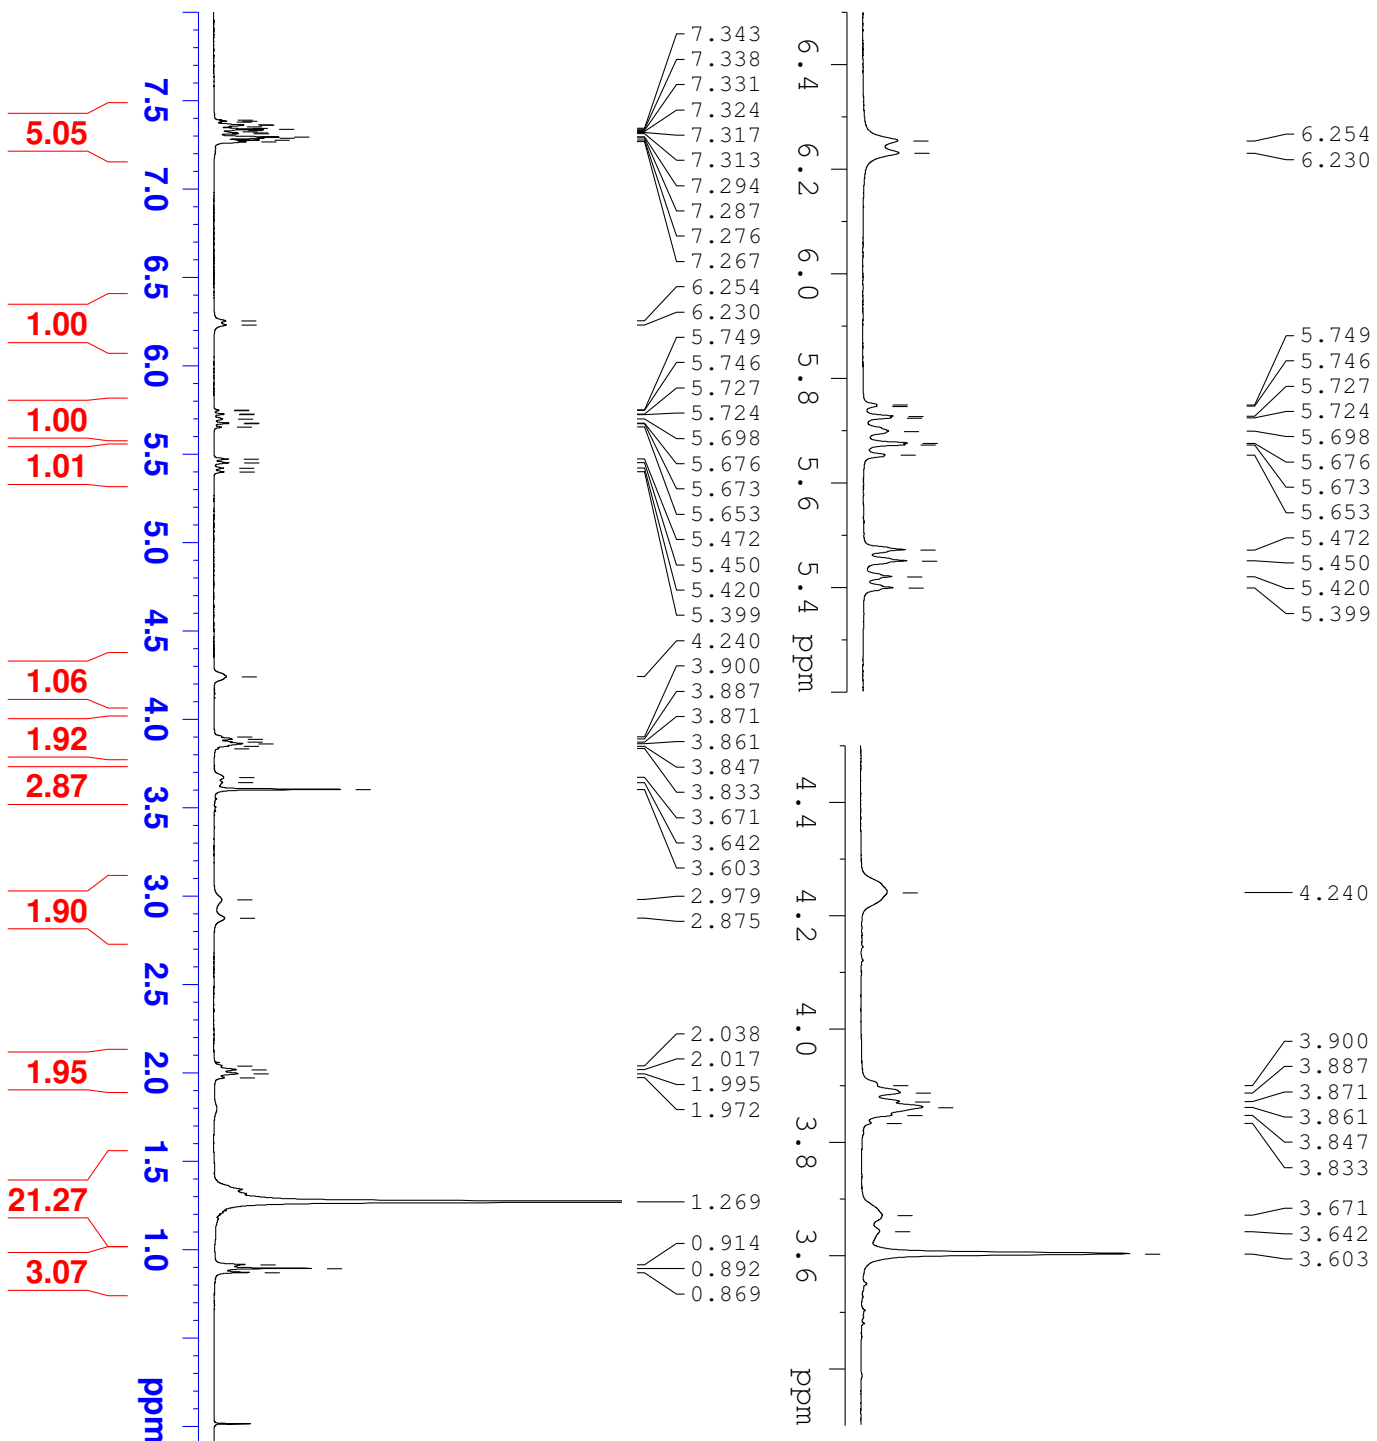

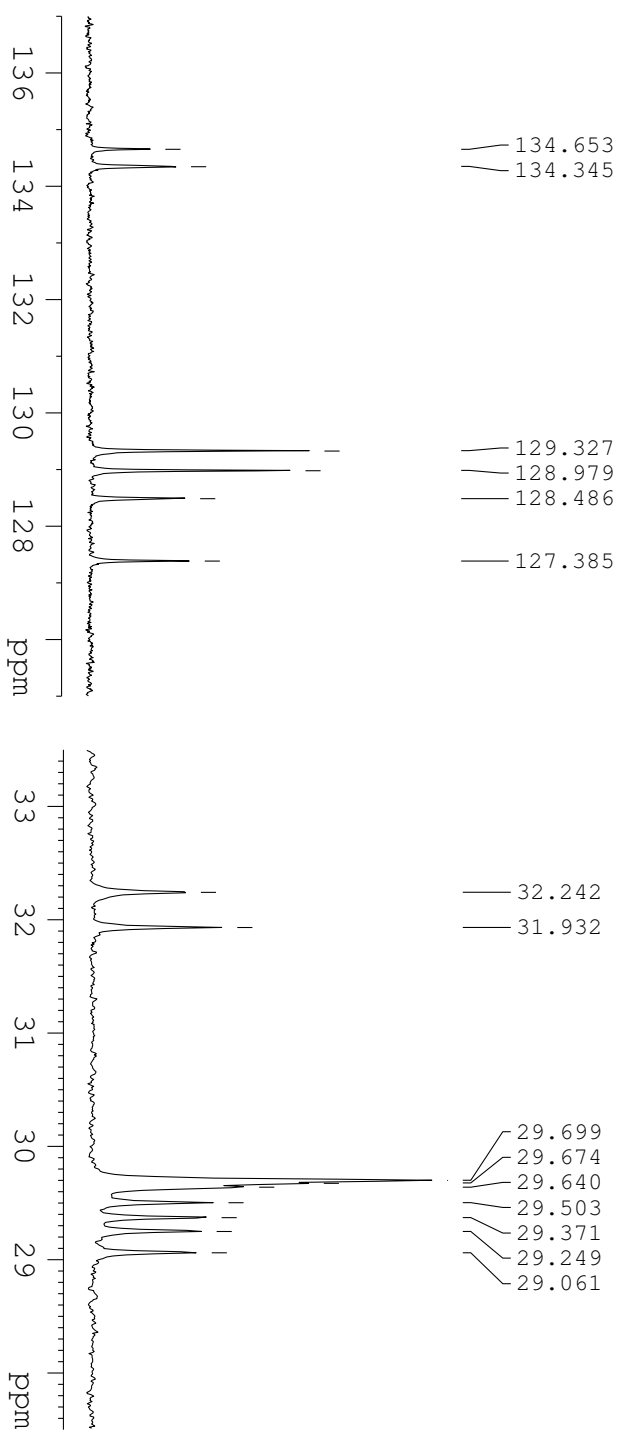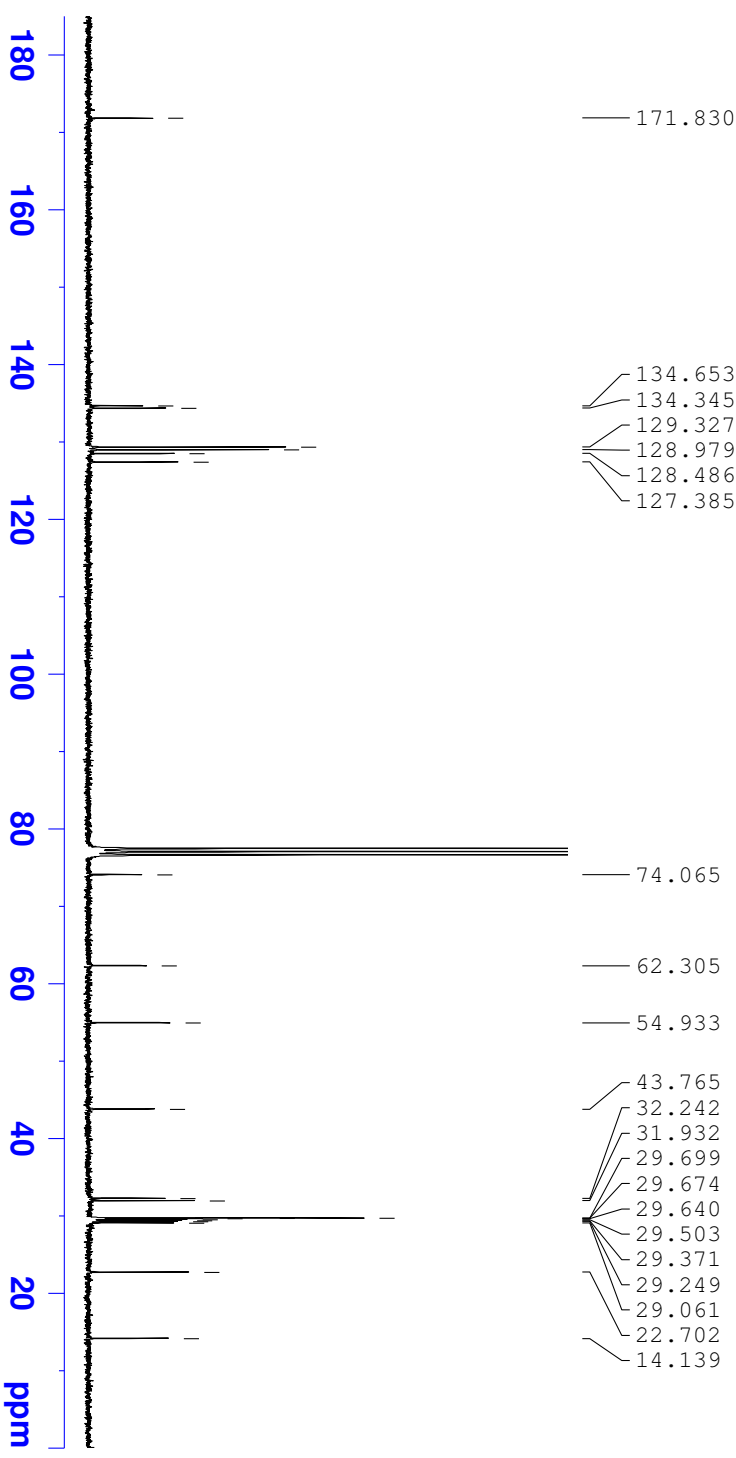

Current Data Parameters  
 NAME 403  
 EXPNO 2  
 PROCNO 1

F2 - Acquisition Parameters  
 Date\_ 20120606  
 Time 16.28  
 INSTRUM FOURIER300  
 PROBHD 5 mm DUL 13C-1  
 PULPROG zgpg30  
 TD 65536  
 DS 4  
 NS 6000  
 SOLVENT CDCl3

===== CHANNEL f1 =====  
 SFO1 75.4878687 MHz  
 NUC1 13C  
 P1 16.00 usec  
 PLW1 60.00000000 W

===== CHANNEL f2 =====  
 SFO2 300.1812007 MHz  
 NUC2 1H  
 CPDPRG12 waltz16  
 PCPD2 105.00 usec  
 PLW2 10.00000000 W  
 PLW12 0.36280999 W  
 PLW13 0.40000001 W

F2 - Processing parameters  
 SI 32768  
 SF 75.4803210 MHz  
 MWDW EM  
 SSB 0  
 LB 1.00 Hz  
 GB 0  
 PC 1.40

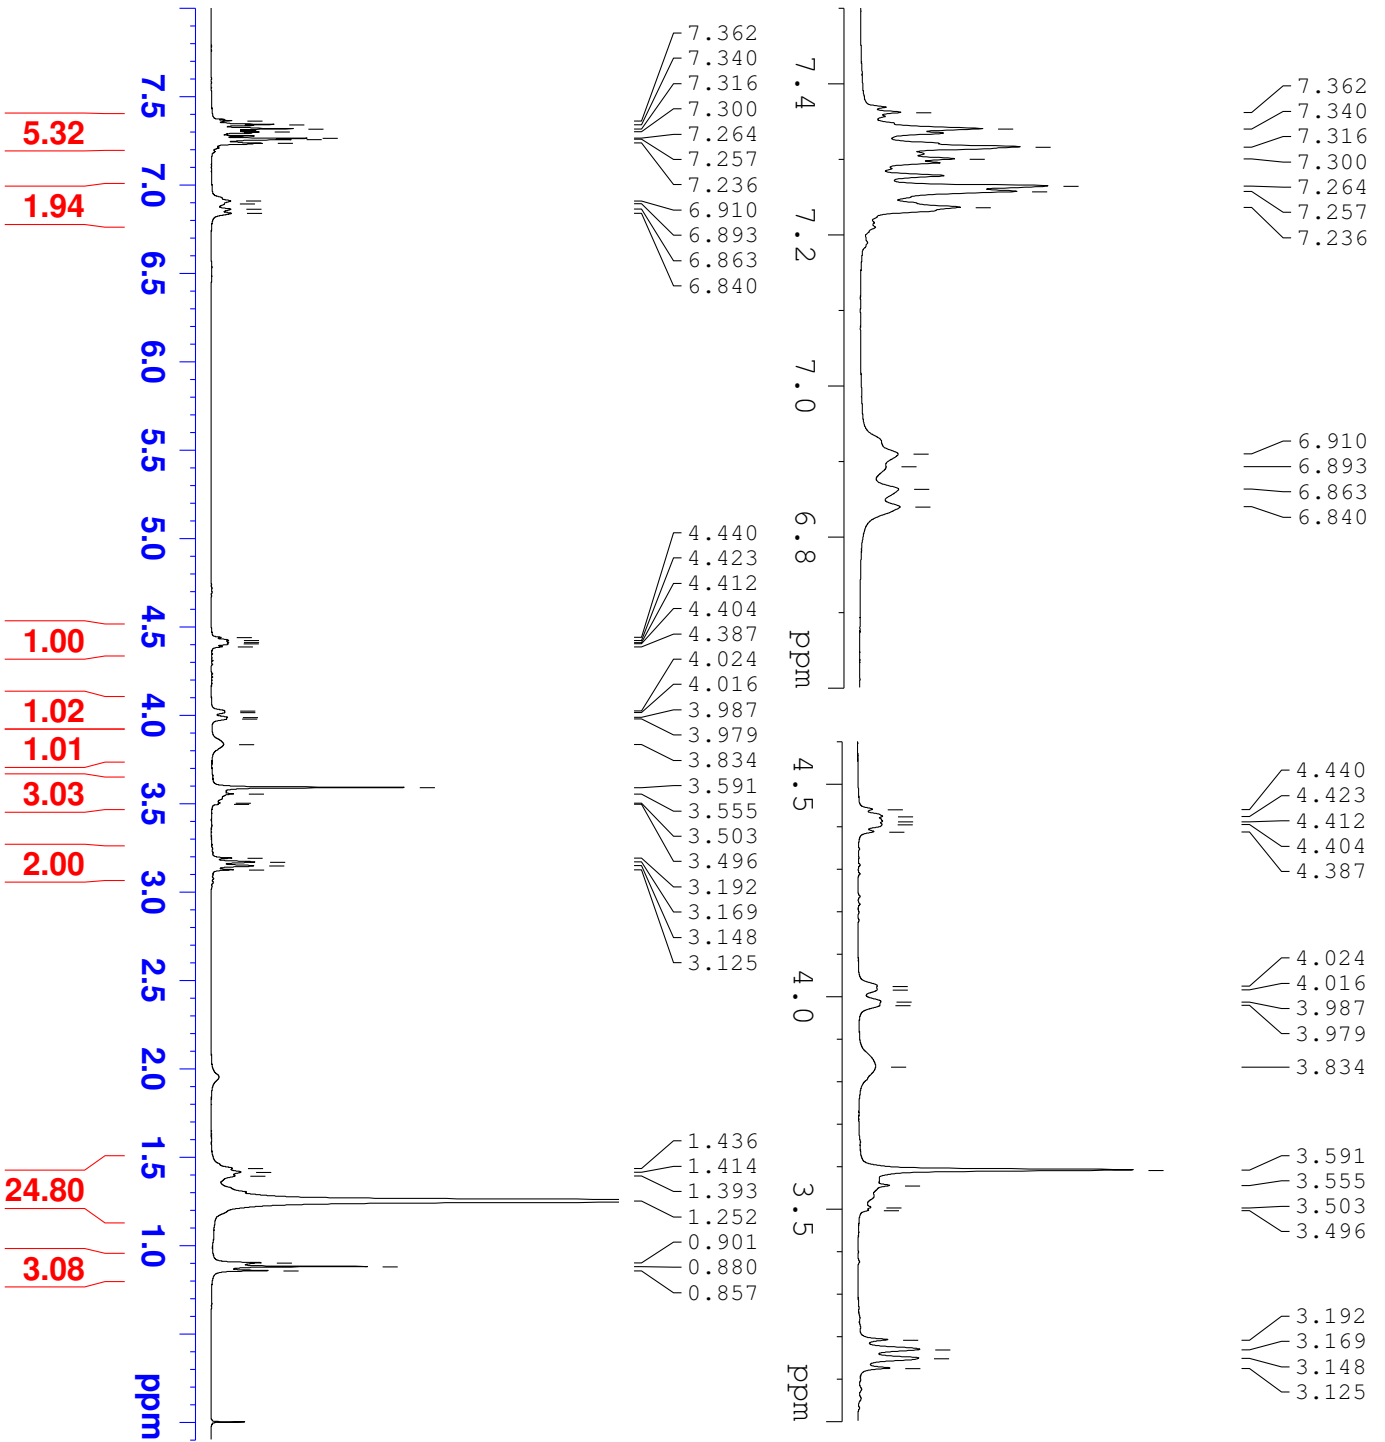

Current Data Parameters  
 NAME 404  
 EXPNO 1  
 PROCNO 1

F2 - Acquisition Parameters

Date\_ 20120610  
 Time 16.18  
 INSTRUM FOURIER300  
 PROBD 5 mm DUL 13C-1  
 PULPROG zg30  
 TD 65536  
 NS CDC13  
 SOLVENT 16  
 DS 2  
 SWH 6103.516 Hz  
 FIDRES 0.093132 Hz  
 AQ 5.3687091 sec  
 RG 16.949  
 DW 81.920 usec  
 DE 6.50 usec  
 TE 296.4 K  
 D1 1.00000000 sec  
 TD0 1

==== CHANNEL f1 =====  
 SFO1 300.1818537 MHz  
 NUC1 1H  
 P1 8.75 usec  
 PLW1 25.00000000 W

F2 - Processing parameters  
 SI 65536  
 SF 300.1800035 MHz  
 WDM EM  
 SSB 0  
 LB 0.30 Hz  
 GB 0  
 PC 1.00

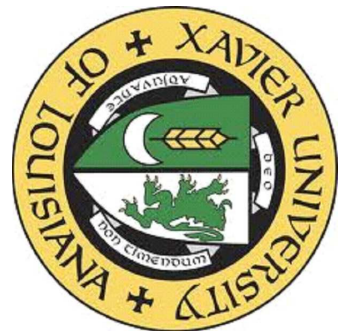

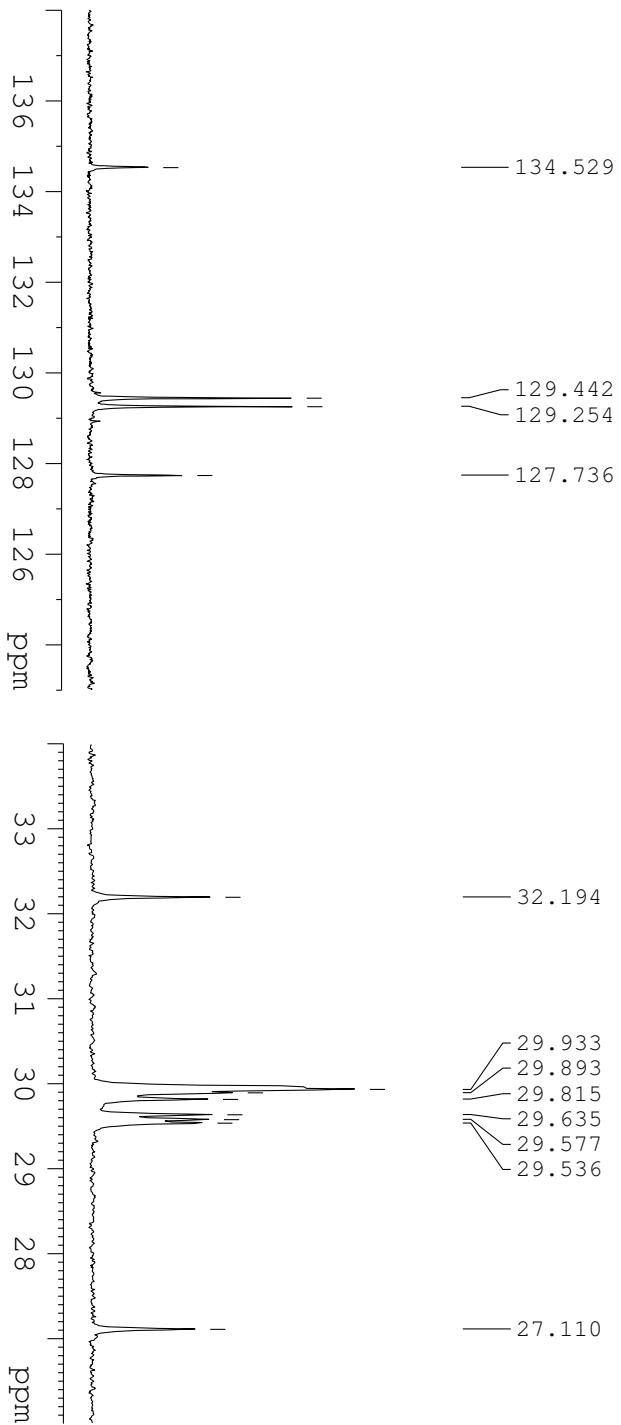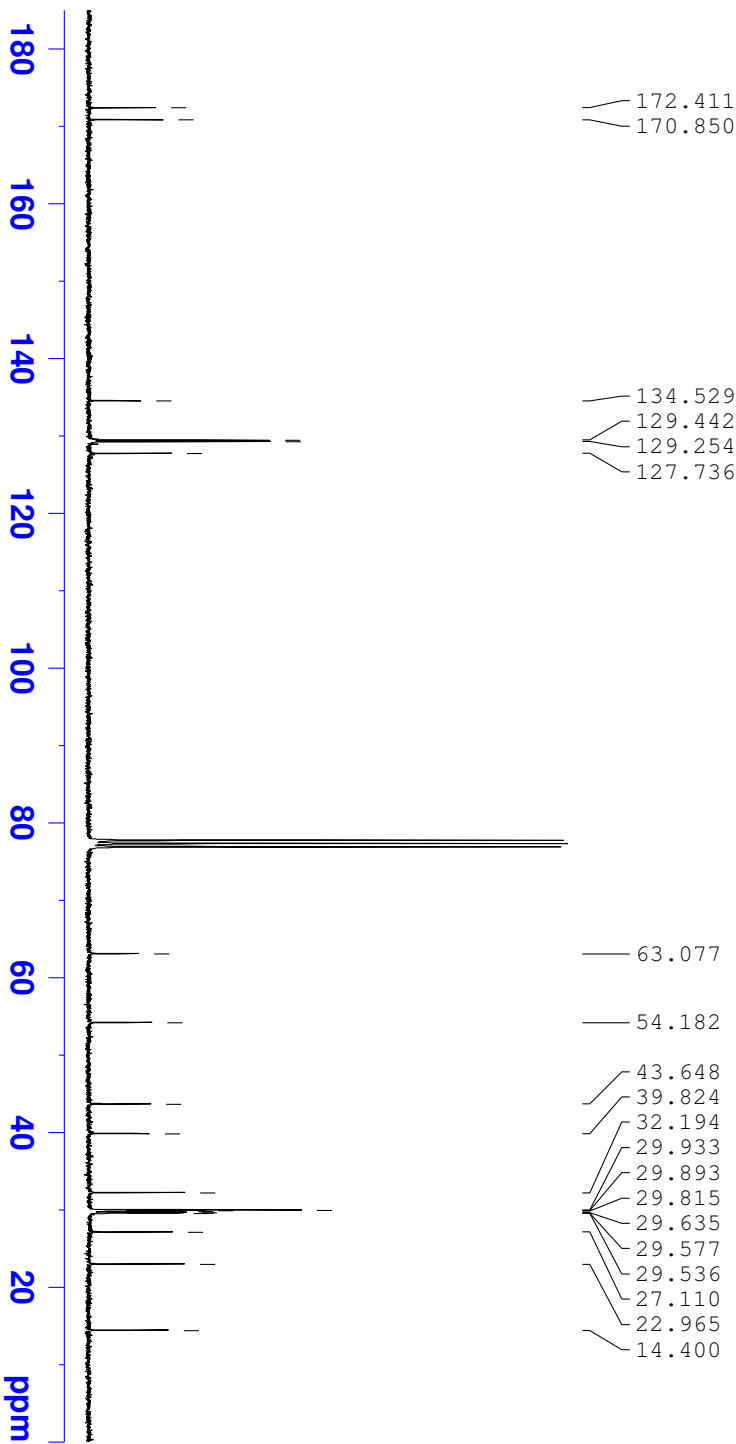

Current Data Parameters  
 NAME 404  
 EXPNO 2  
 PROCNO 1

F2 - Acquisition Parameters  
 Date\_ 20120611  
 Time 18.18  
 INSTRUM FOURIER300  
 PROBD 5 mm DUL 13C-1  
 PULPROG zgpg30  
 TD 65536  
 SOLVENT CDCl3  
 NS 4000  
 DS 4  
 SWH 24414.063 Hz  
 FIDRES 0.372529 Hz  
 AQ 1.3421773 sec  
 RG 501.187  
 DW 20.480 usec  
 DE 6.50 usec  
 TE 296.8 K  
 D1 2.0000000 sec  
 D11 0.0300000 sec  
 D31 0.00001600 sec  
 D40 0.02432300 sec  
 L4 34  
 L5 49  
 F32 105.00 usec  
 TD0 1

==== CHANNEL f1 =====  
 SFO1 75.4878687 MHz  
 NUC1 13C  
 P1 16.00 usec  
 PLW1 60.00000000 W

==== CHANNEL f2 =====  
 SFO2 300.1812007 MHz  
 NUC2 1H  
 CPDPRG12 waltz16  
 PCPD2 105.00 usec  
 PLW2 10.00000000 W  
 PLW12 0.36280999 W  
 PLW13 0.40000001 W

F2 - Processing parameters  
 SI 32768  
 SF 75.4803012 MHz  
 WDW EM  
 SSB 0  
 LB 1.00 Hz  
 GB 0  
 PC 1.40



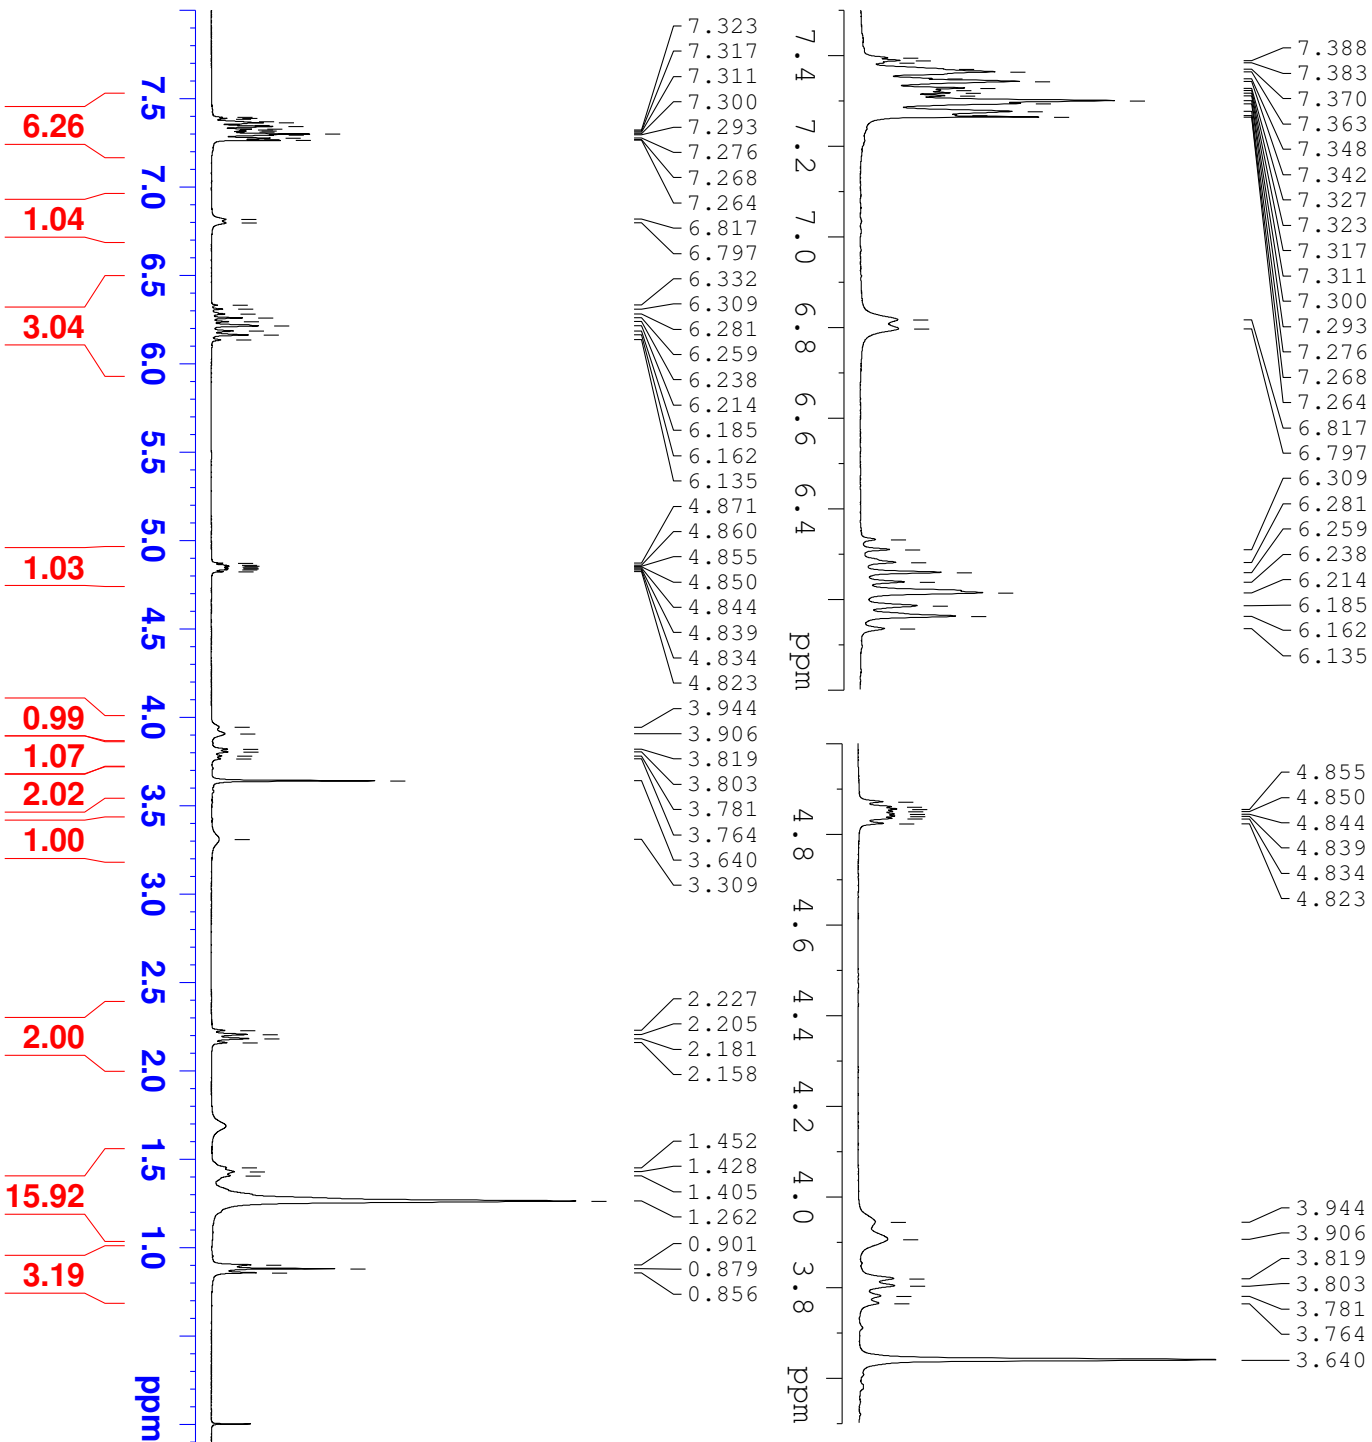

Current Data Parameters  
 NAME 406  
 EXPNO 1  
 PROCNO 1

F2 - Acquisition Parameters  
 Date\_ 20120714  
 Time 18.10  
 INSTRUM FOURIER300  
 PROBHD 5 mm DUL 13C-1  
 PULPROG zg30  
 TD 65536  
 SOLVENT CDC13  
 NS 32  
 DS 2  
 SWH 6103.516 Hz  
 FIDRES 0.093132 Hz  
 AQ 5.3687091 sec  
 RG 39.1338  
 DW 81.920 usec  
 DE 6.50 usec  
 TE 296.4 K  
 D1 1.00000000 sec  
 TD0 1

==== CHANNEL f1 =====  
 SFO1 300.1818537 MHz  
 NUC1 1H  
 P1 8.75 usec  
 PLW1 25.00000000 W

F2 - Processing parameters  
 SI 65536  
 SF 300.1800037 MHz  
 WDM EM  
 SSB 0  
 LB 0.30 Hz  
 GB 0  
 PC 1.00



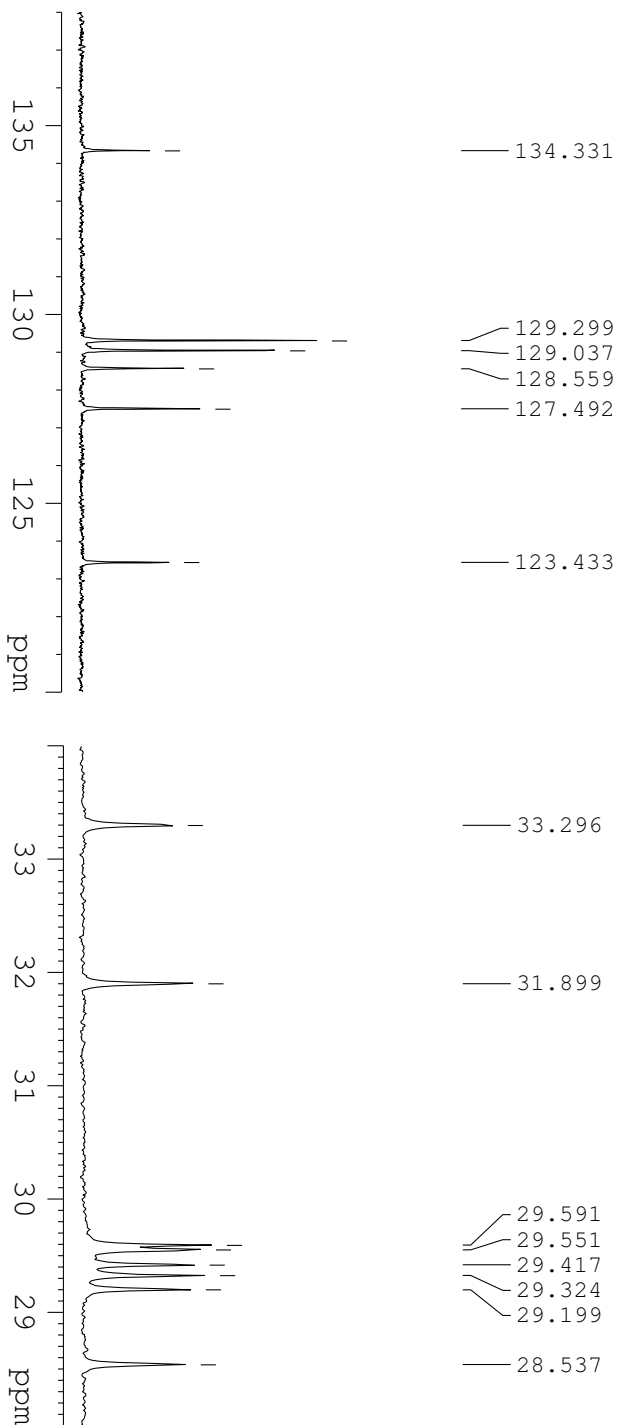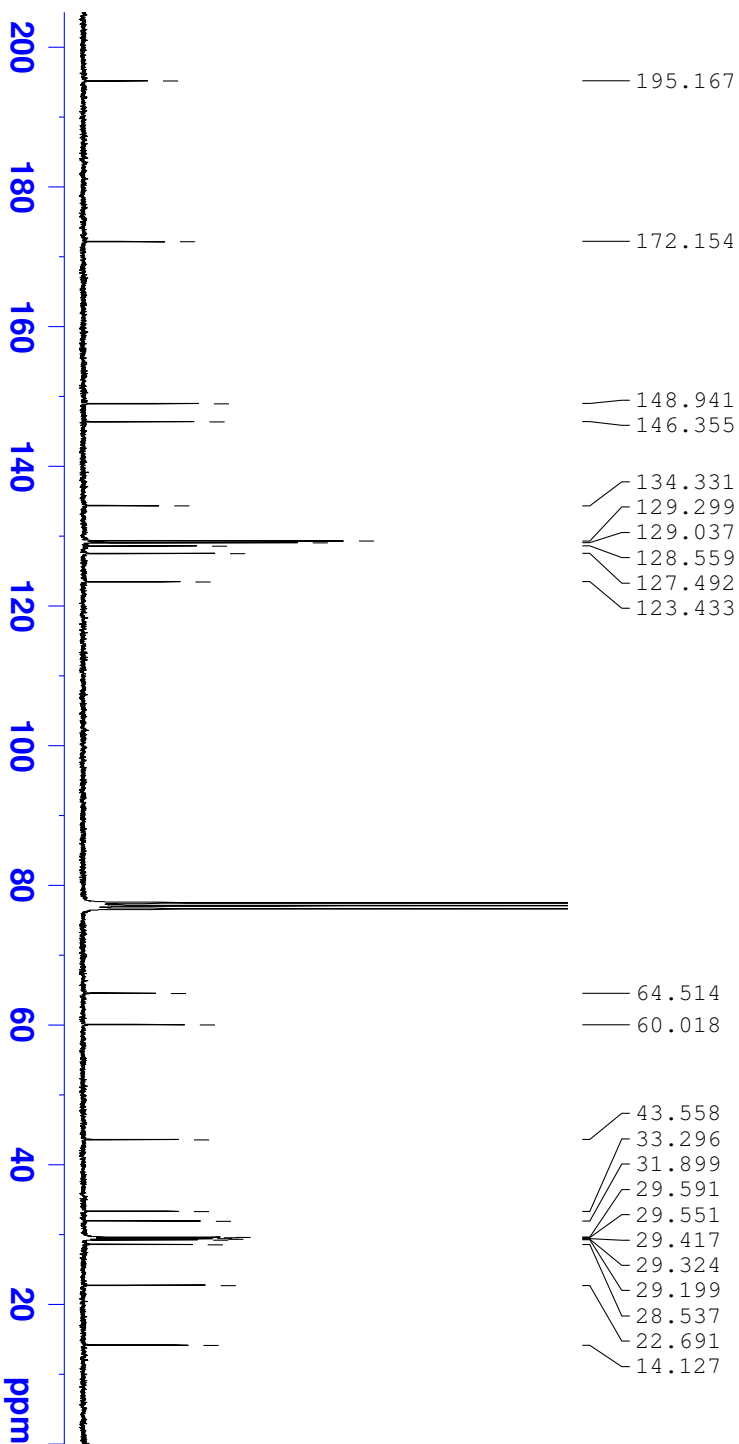

Current Data Parameters  
 NAME 406  
 EXPNO 2  
 PROCNO 1

F2 - Acquisition Parameters  
 Date\_ 20120714  
 Time 18.23  
 INSTRUM FOURIER300  
 PROBHD 5 mm DUL 13C-1  
 PULPROG zgpg30  
 TD 65536  
 SOLVENT CDCl3  
 NS 2000  
 DS 4  
 SWH 24414.063 Hz  
 FIDRES 0.372529 Hz  
 AQ 1.3421773 sec  
 RG 501.187  
 DW 20.480 usec  
 DE 6.50 usec  
 TE 296.5 K  
 D1 2.00000000 sec  
 D11 0.03000000 sec  
 D31 0.00001600 sec  
 D40 0.02432300 sec  
 L4 34  
 L5 49  
 F32 105.00 usec  
 TD0 1

==== CHANNEL F1 =====  
 SFO1 75.4878687 MHz  
 NUC1 13C  
 P1 16.00 usec  
 PLW1 60.00000000 W

==== CHANNEL F2 =====  
 SFO2 300.1812007 MHz  
 NUC2 1H  
 CPDPRG12 waltz16  
 PCPD2 105.00 usec  
 PLW2 10.00000000 W  
 PLW12 0.36280999 W  
 PLW13 0.40000001 W

F2 - Processing parameters  
 SI 32768  
 SF 75.4803210 MHz  
 WDW EM  
 SSB 0  
 LB 1.00 Hz  
 GB 0  
 PC 1.40



COSY spectrum of analog 403

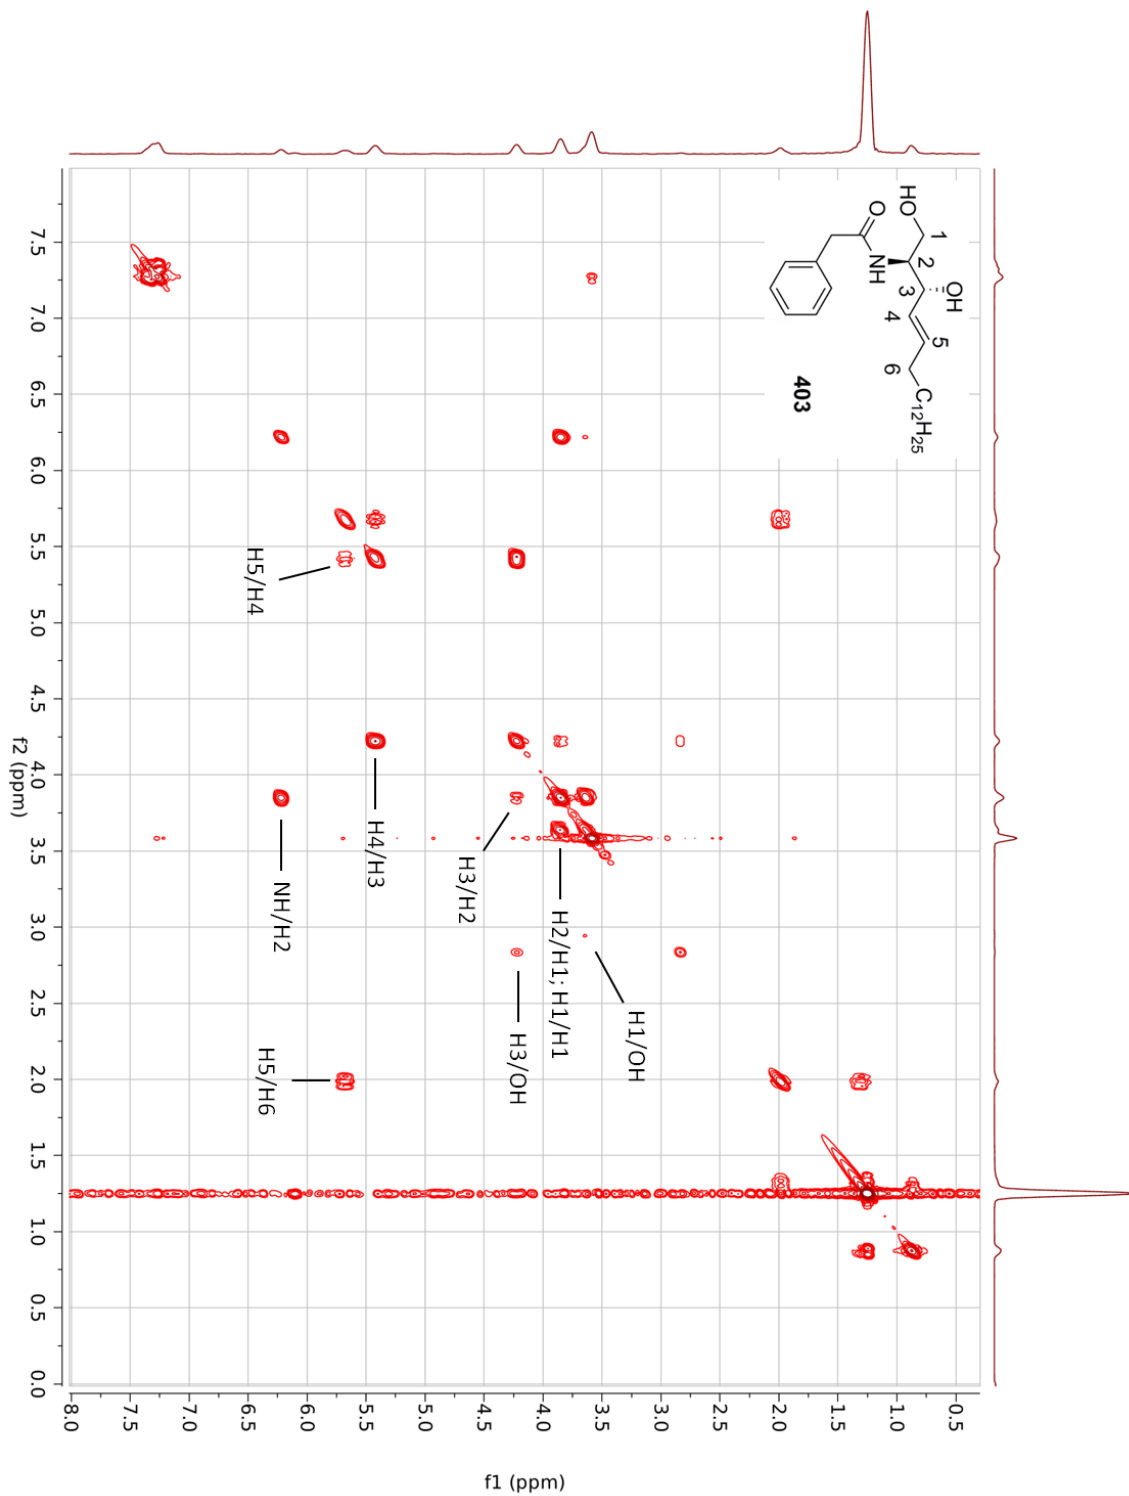



# 1D NOE spectra of analog 403

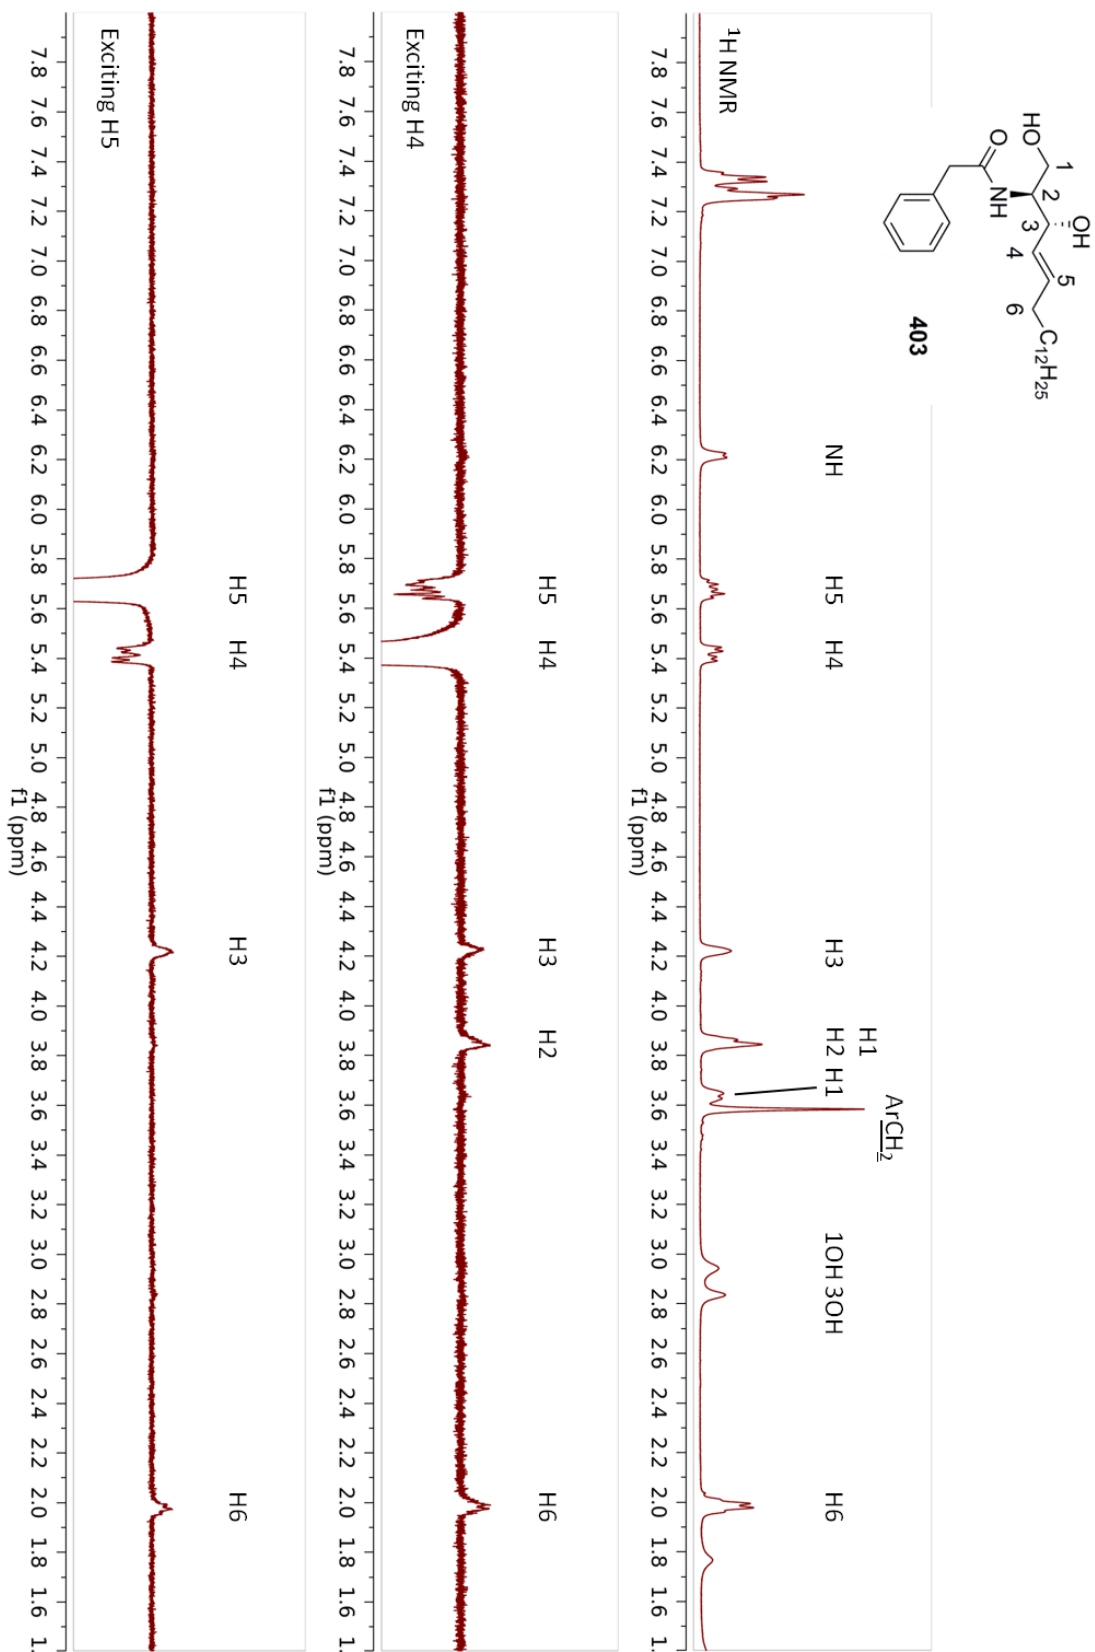

COSY spectrum of analog 406

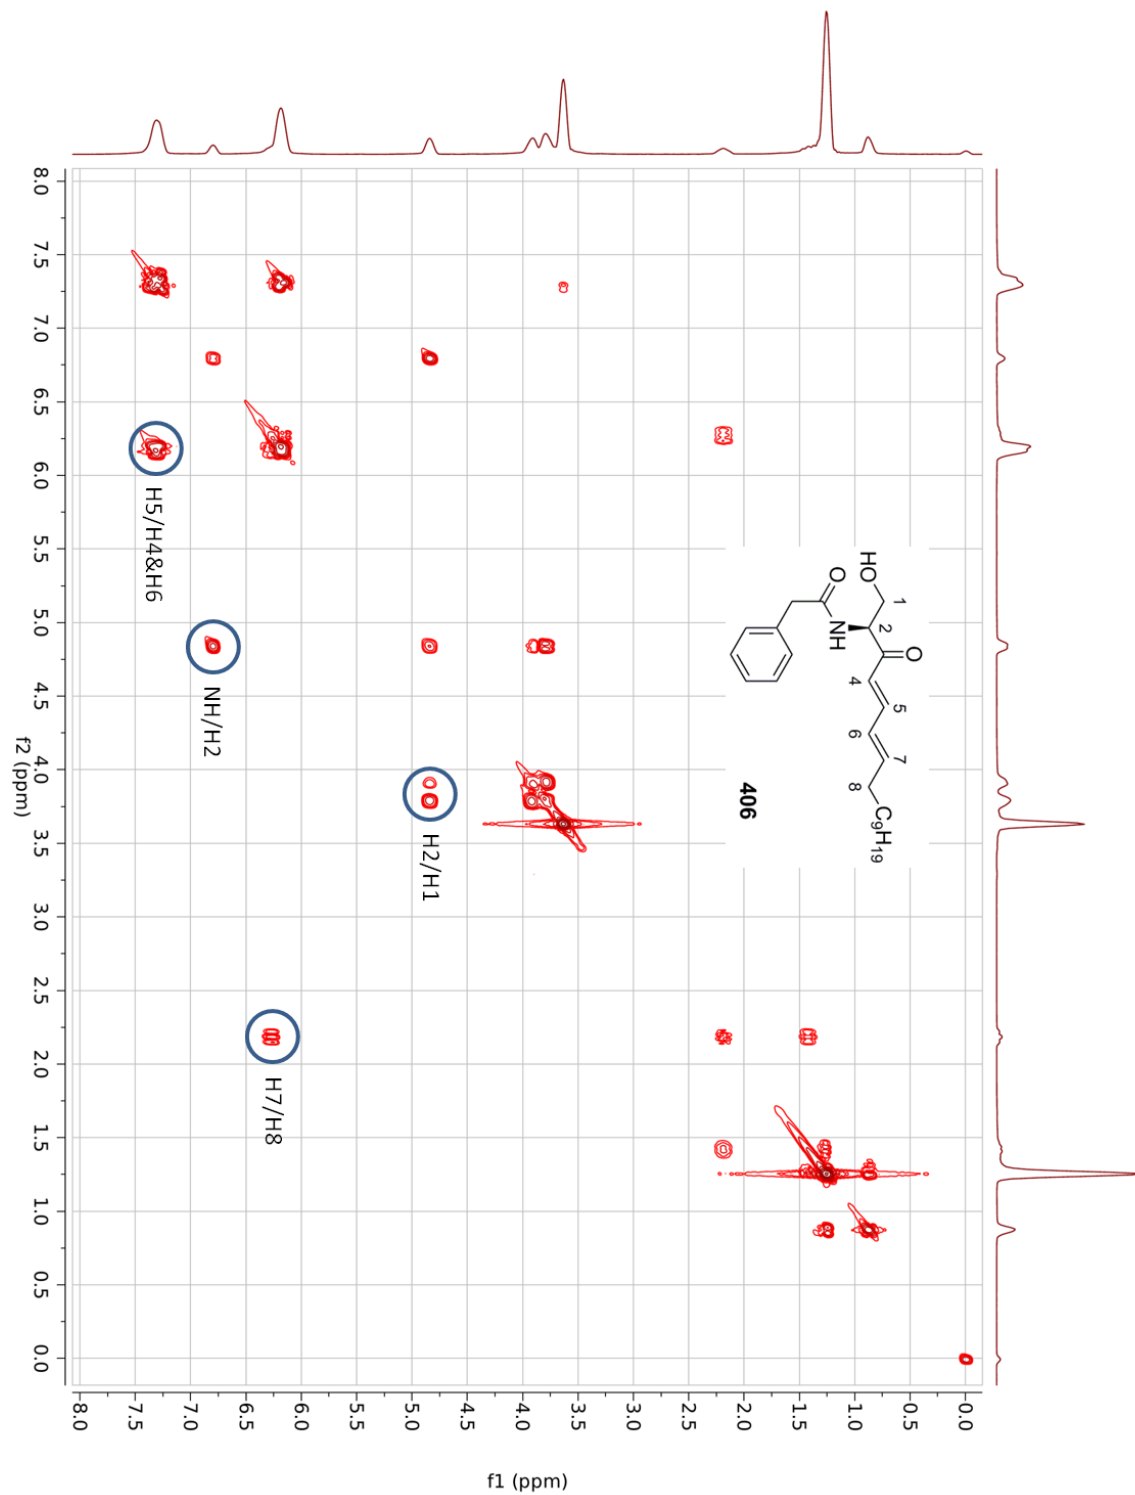

1D NOE spectra of analog 406

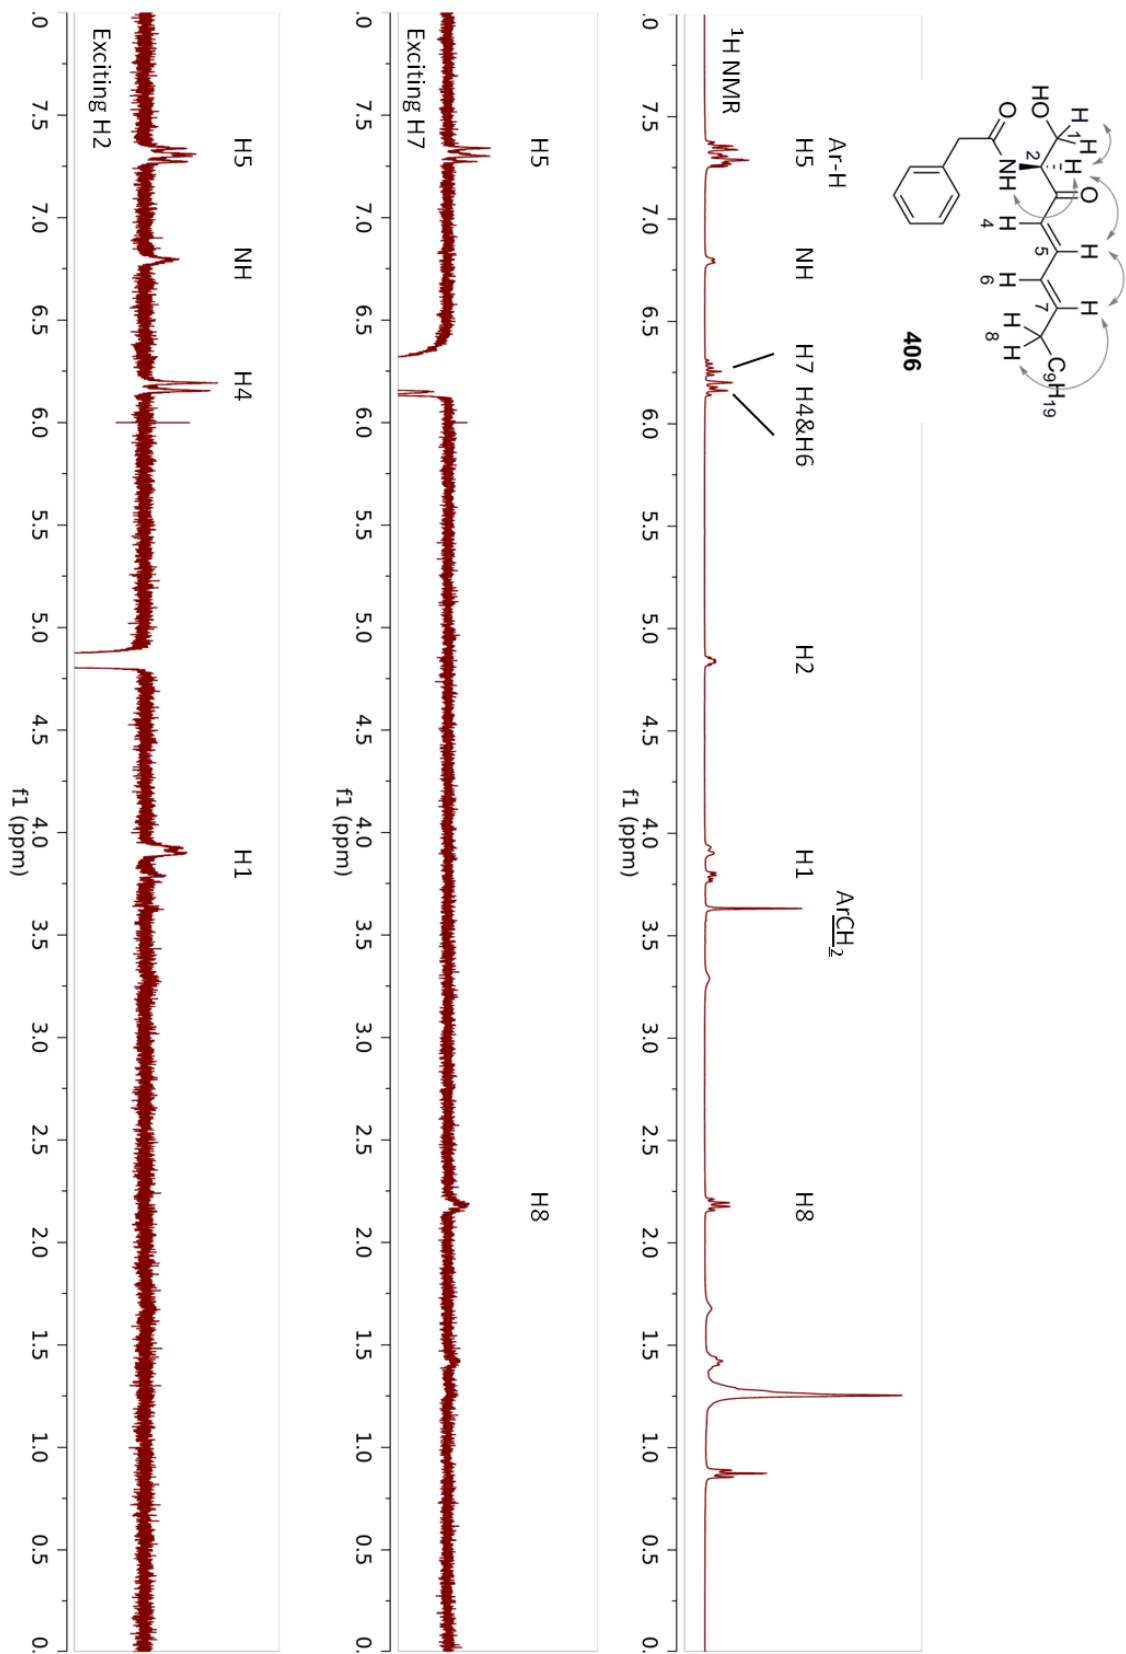

COSY spectrum of compound 3-up

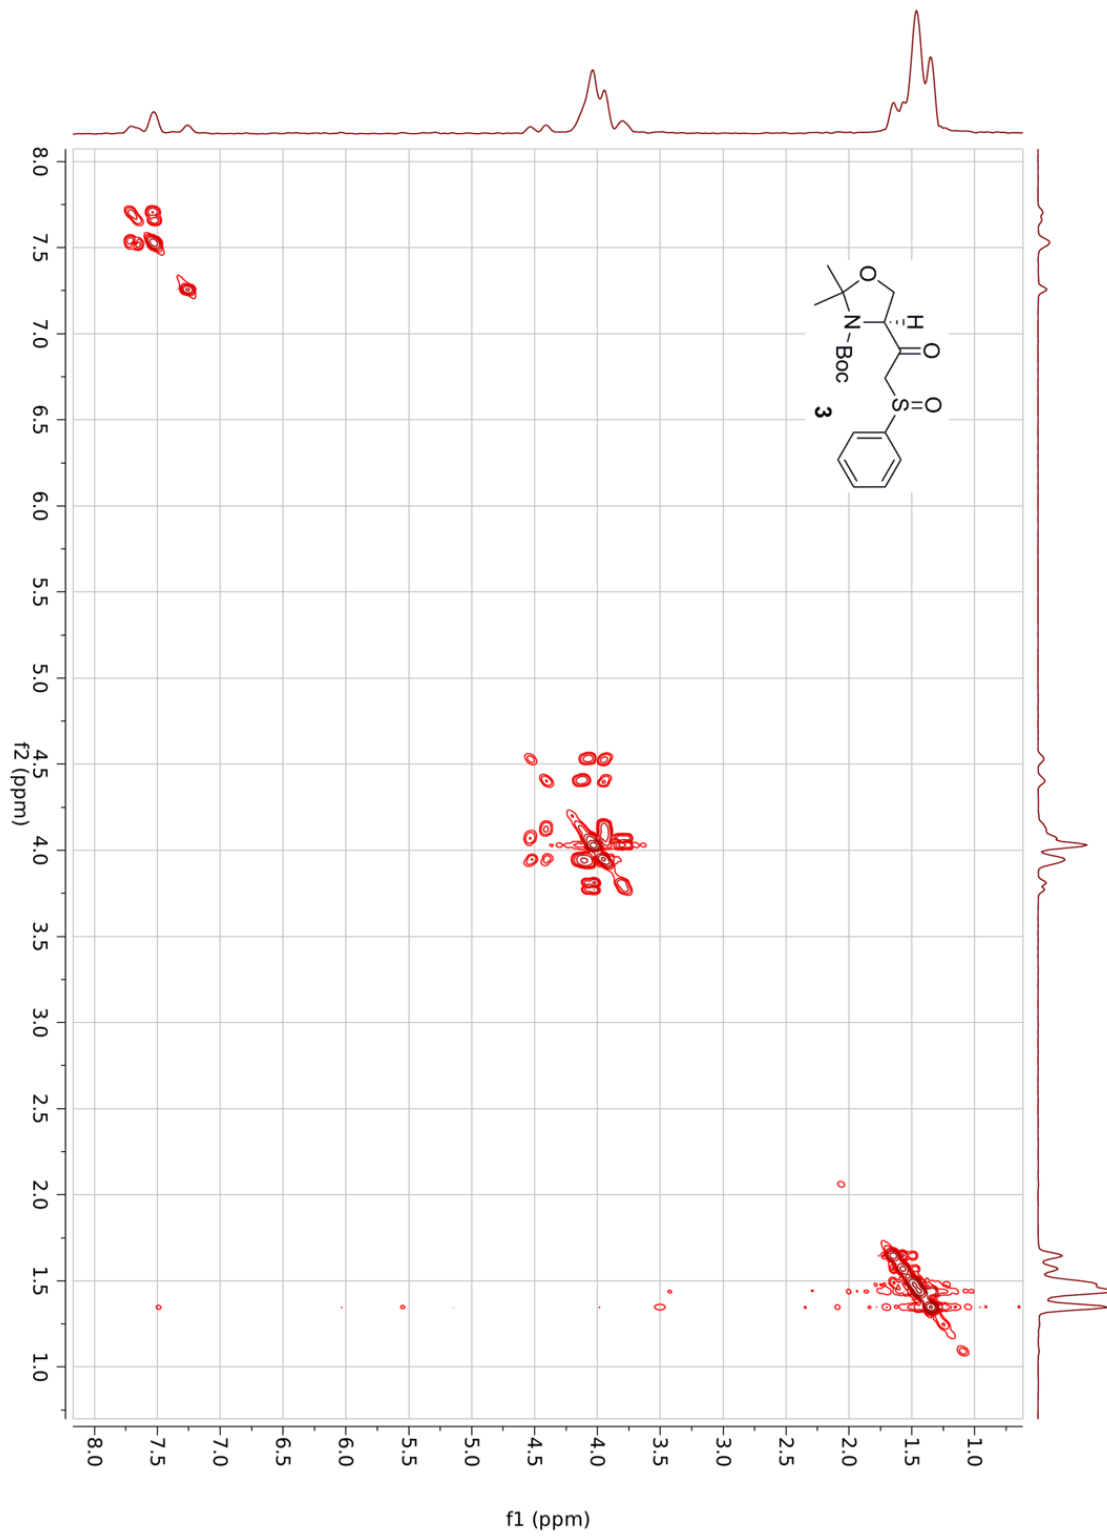

Zoom-in image of the COSY spectrum of compound 3-up (4.9 - 3.4 ppm)

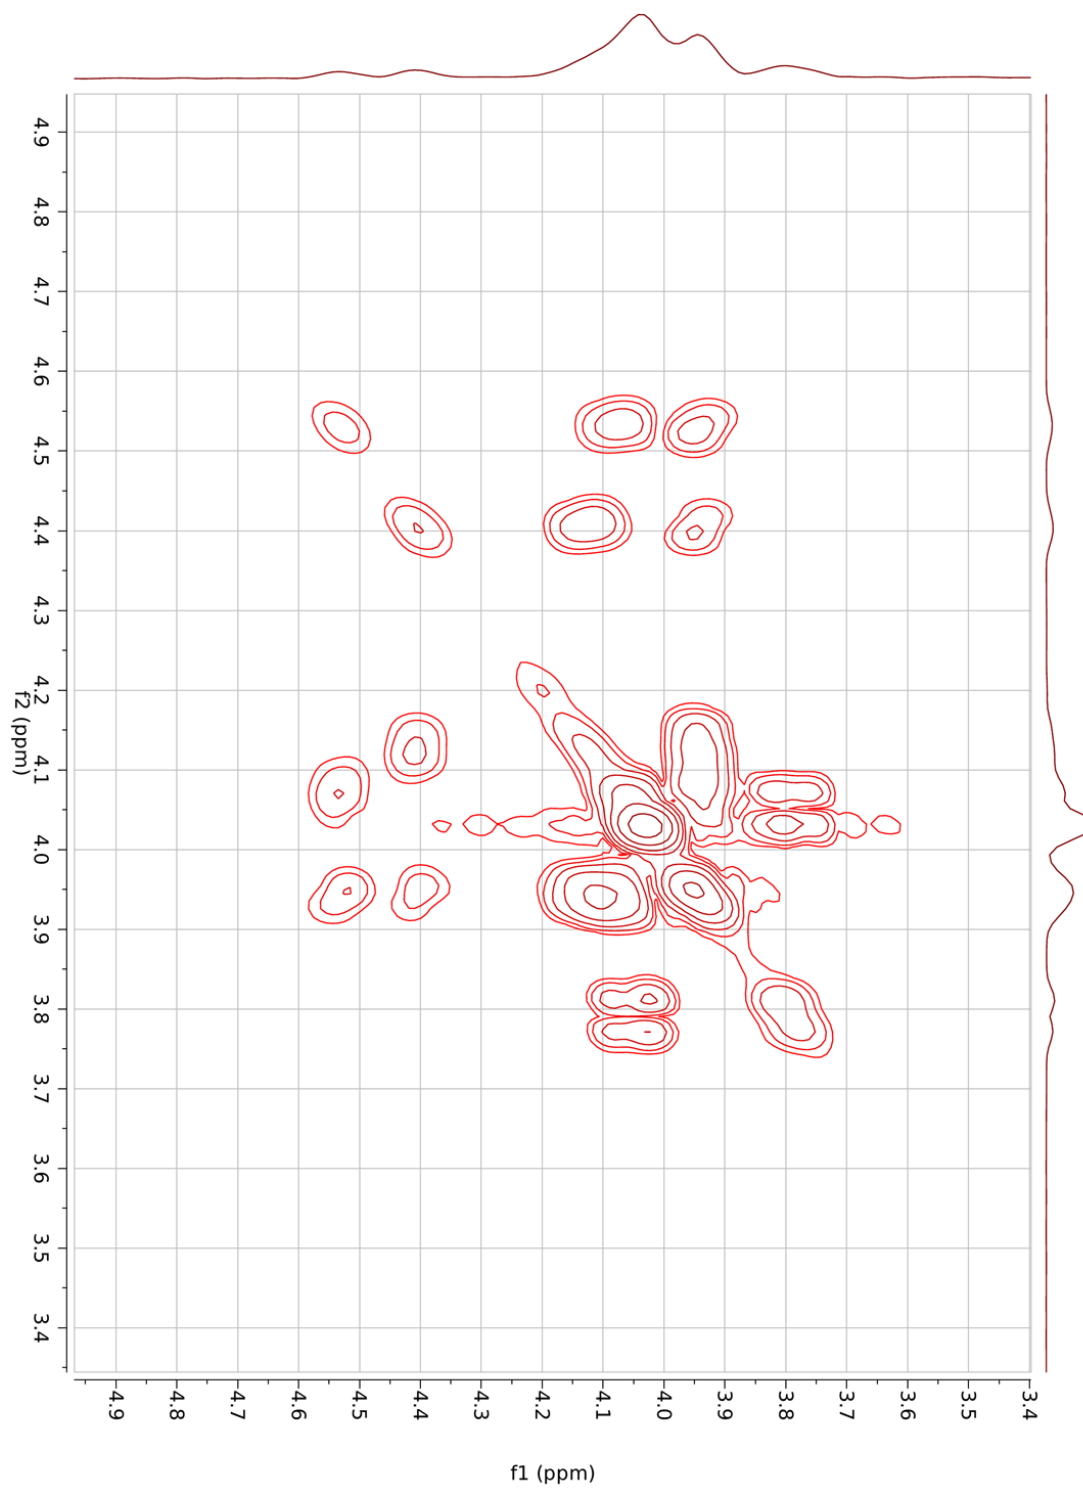

COSY spectrum of analog 401

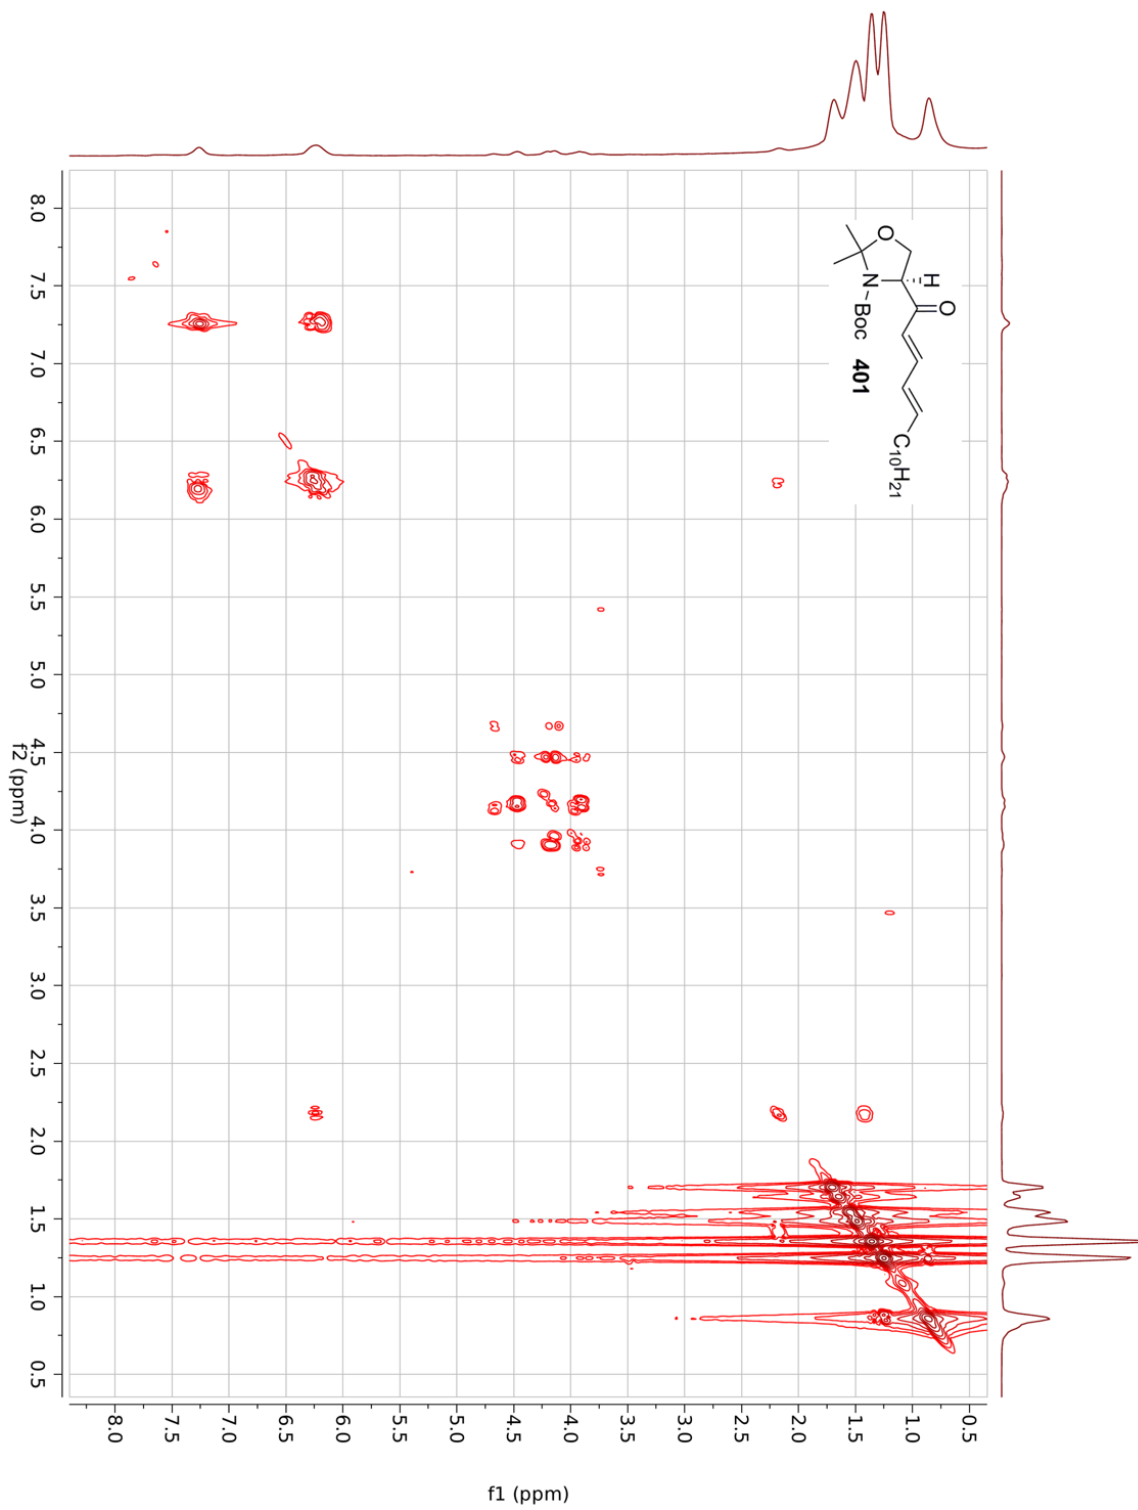

COSY spectrum of analog 402

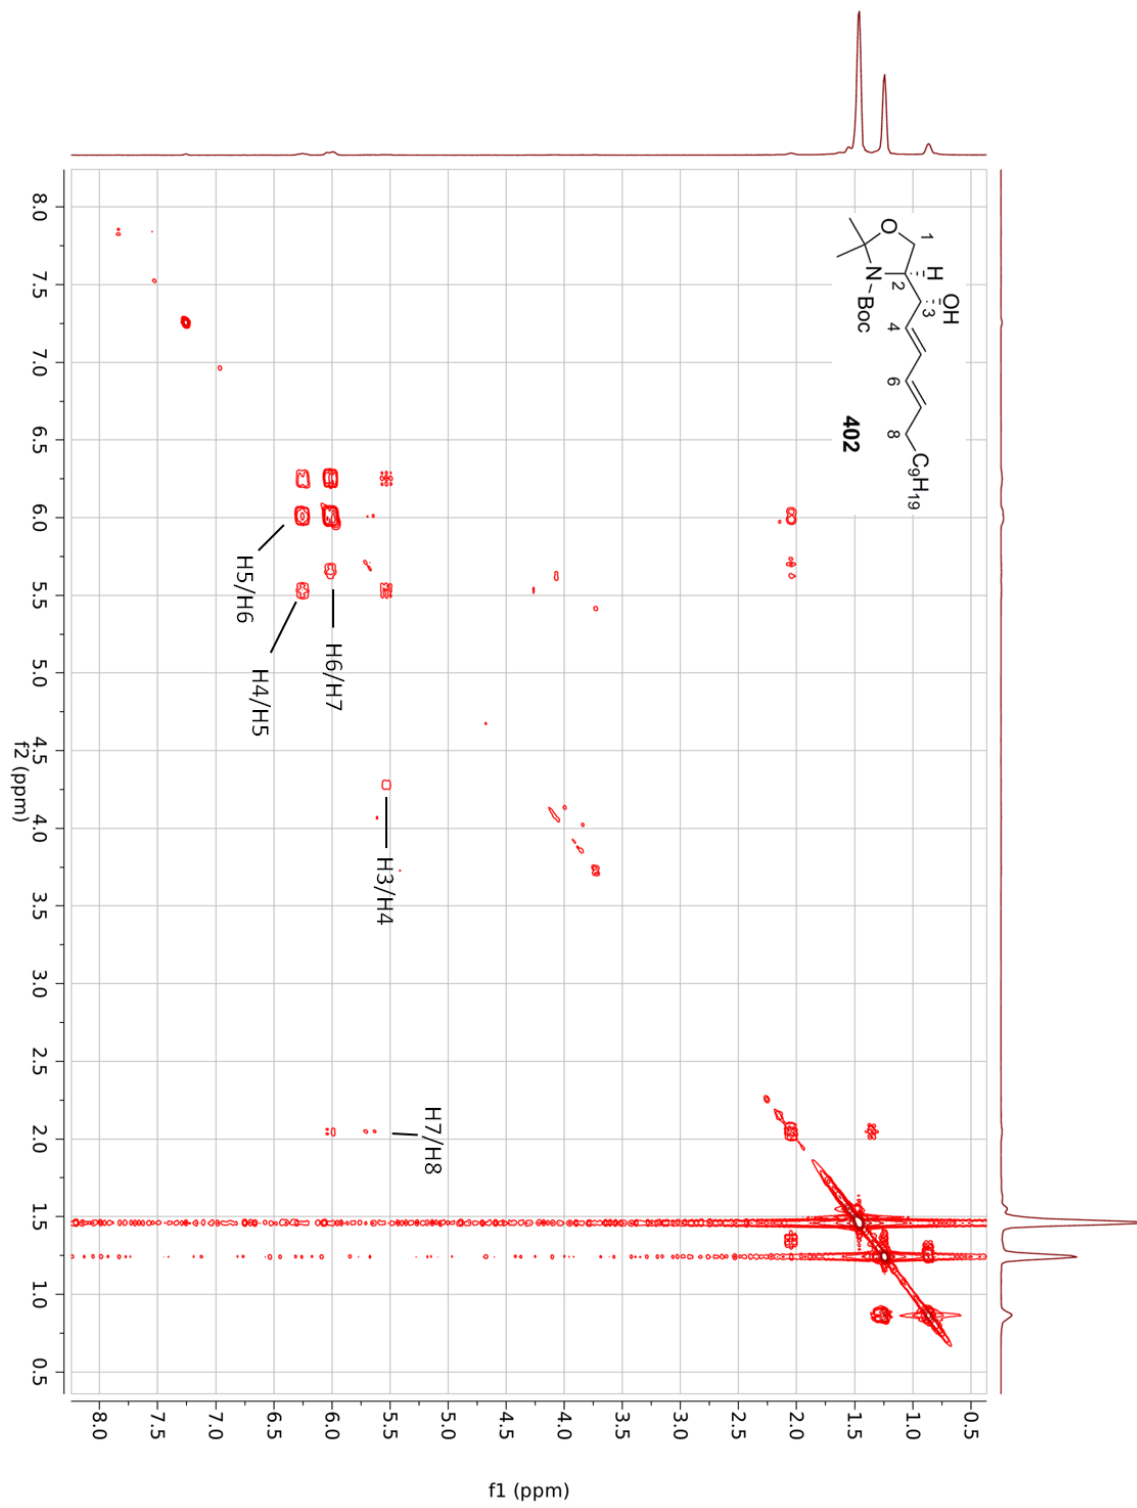

COSY spectrum of analog 404

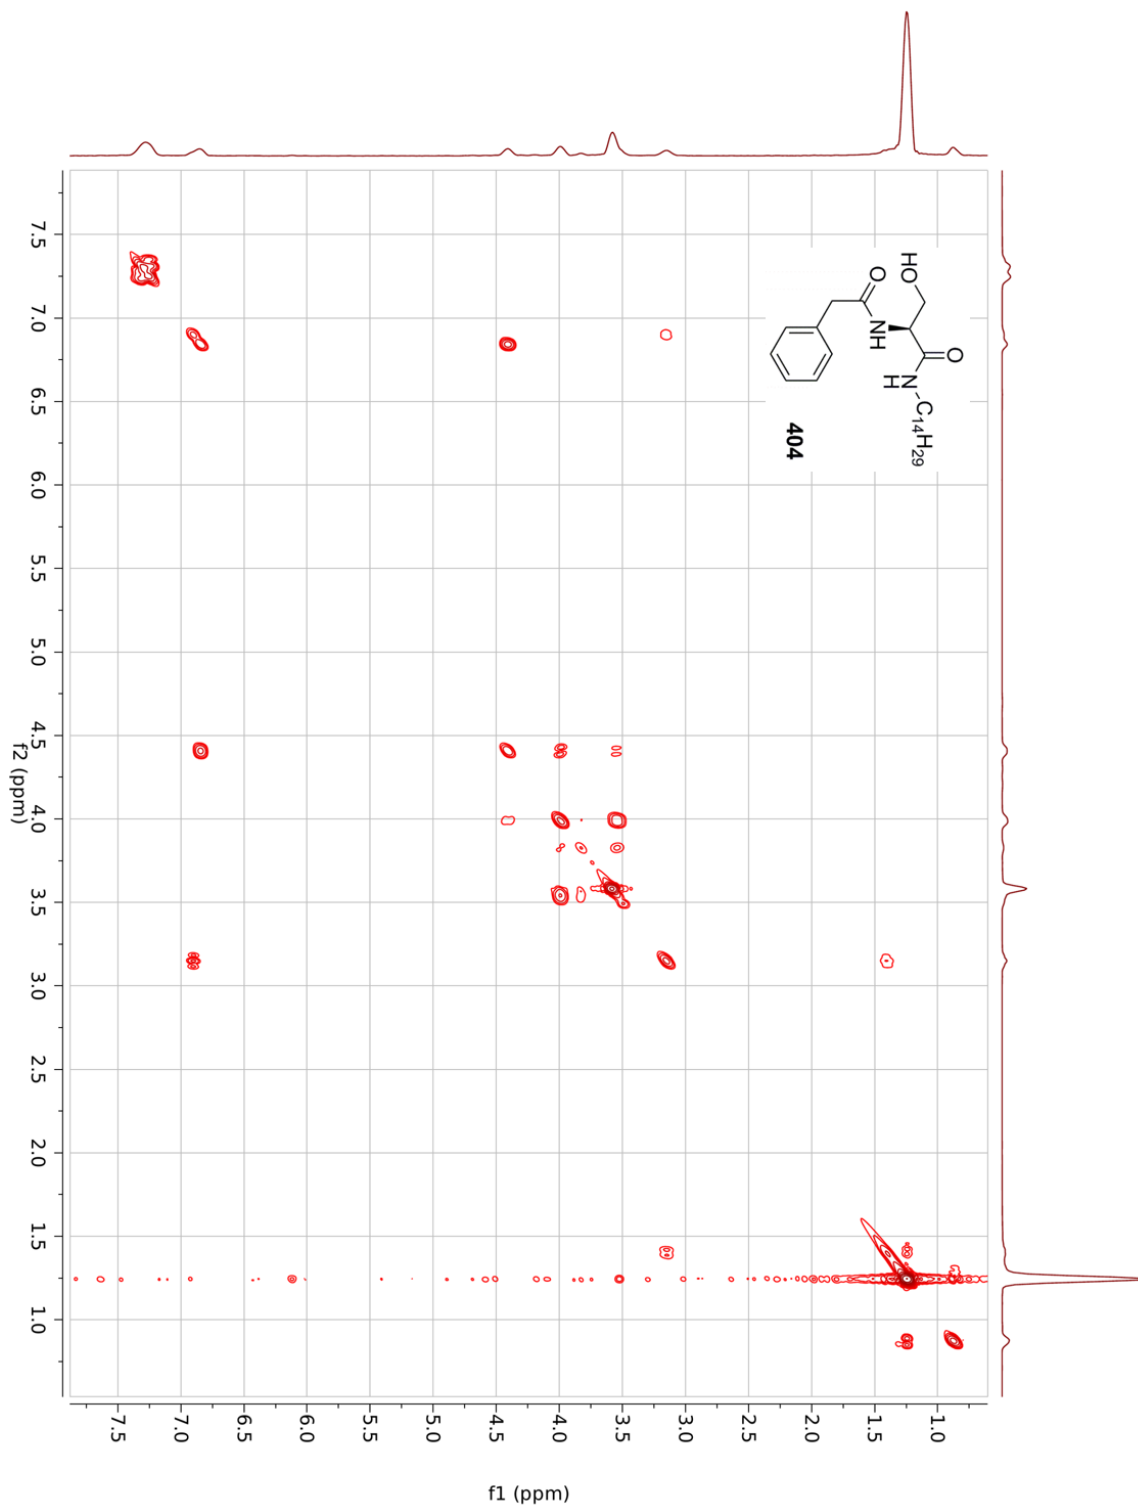



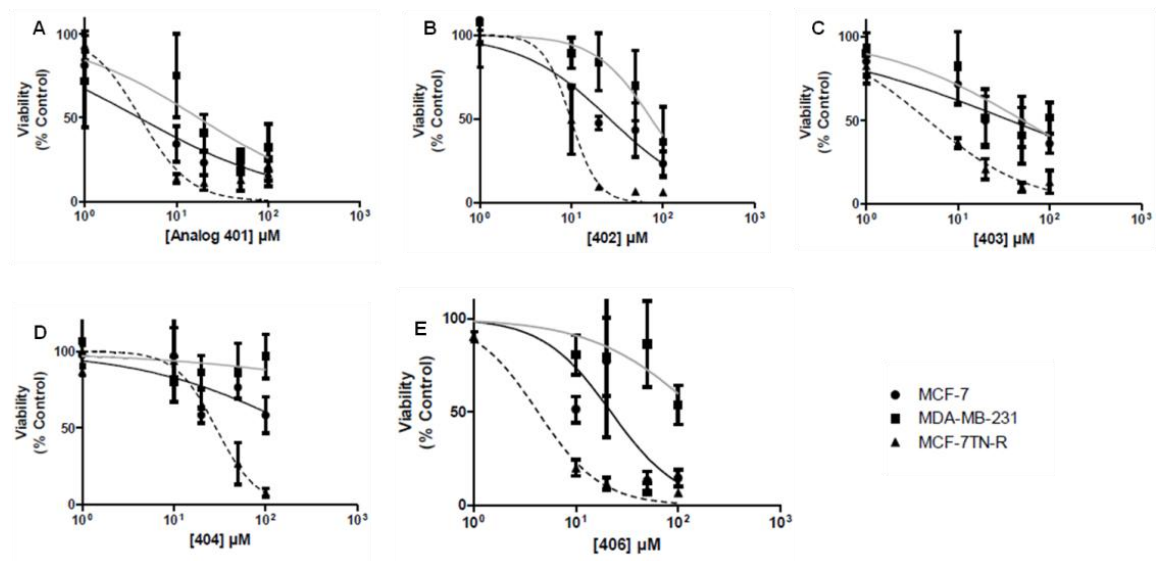

**Figure S1.** Effect of ceramide analogs on cell viability of breast cancers. MCF-7, MDA-MB-231, and MCF-7TN-R cells were treated with increasing concentrations of analogs for 24 h. The values are the mean  $\pm$  SE of three independent experiments.

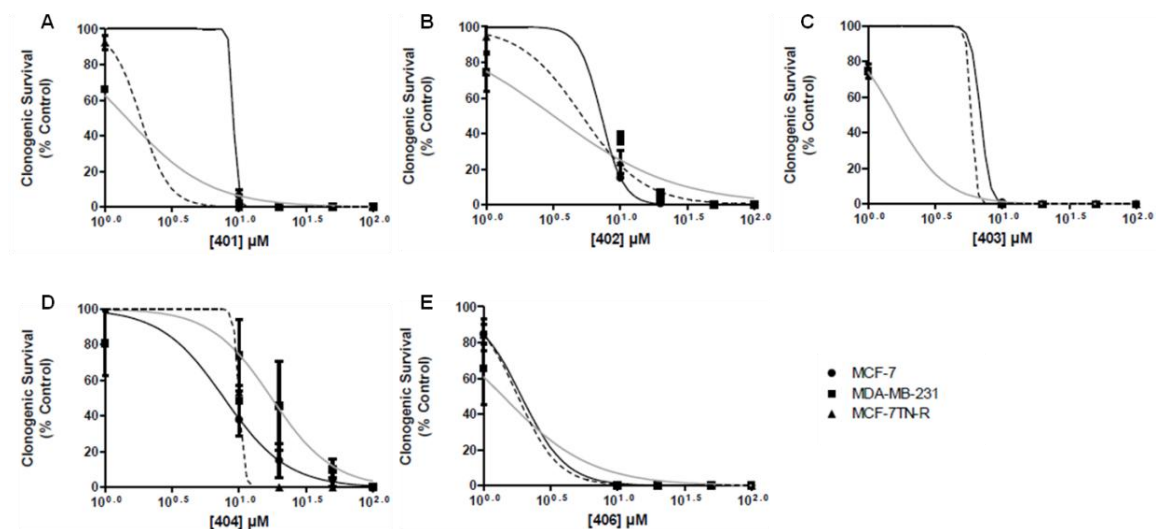

**Figure S2.** Effect of ceramide analogs on breast cancer clonogenic survival. MCF-7, MDA-MB-231, and MCF-7TN-R cells were treated with increasing concentrations of analogs and allowed to grow until colony formation was noted (generally 10-12 days). The values are the mean  $\pm$  SE of three independent experiments.
